# Supplementary material for: Variability in Vowel Production within and between Days
Source: PubMed Central journal article supplement (PMC4558024; doi:10.1371/journal.pone.0136791), 2015-09-02
Supplement: pone.0136791.s001.pdf [file pone.0136791.s001.pdf]

| Subject | Sex    | Day   | Time    | Average F0 for /IH/ | Average F0 for /EH/ | Average F0 for /UH/ | Average F0 for /EE/ | Average F0 for /OO/ | Average F0 for /AE/ | Average F0 for /AH/ |
|---------|--------|-------|---------|---------------------|---------------------|---------------------|---------------------|---------------------|---------------------|---------------------|
| 1       | Female | Day 1 | 9:00 AM | 170.84              | 174.82              | 173.20              | 189.20              | 202.39              | 167.82              | 163.48              |
| 2       | Female | Day 1 | 9:00 AM | 239.06              | 232.46              | 233.15              | 234.93              | 243.16              | 231.00              | 225.28              |
| 3       | Female | Day 1 | 9:00 AM | 180.96              | 178.13              | 175.58              | 179.60              | 184.46              | 170.77              | 171.85              |
| 4       | Female | Day 1 | 9:00 AM | 208.40              | 203.71              | 204.99              | 210.50              | 218.56              | 202.52              | 199.85              |
| 5       | Male   | Day 1 | 9:00 AM | 101.18              | 95.44               | 98.75               | 97.83               | 103.55              | 92.05               | 92.14               |
| 6       | Male   | Day 1 | 9:00 AM | 119.65              | 115.89              | 114.63              | 115.92              | 118.06              | 112.71              | 111.26              |
| 7       | Female | Day 1 | 9:00 AM | 169.44              | 171.33              | 170.49              | 177.77              | 183.07              | 169.99              | 166.30              |
| 8       | Male   | Day 1 | 9:00 AM | 126.07              | 122.64              | 118.14              | 131.38              | 127.86              | 120.53              | 119.60              |
| 1       | Female | Day 1 | 3:00 PM | 253.16              | 250.18              | 252.37              | 255.39              | 258.01              | 249.36              | 251.23              |
| 2       | Female | Day 1 | 3:00 PM | 224.36              | 234.80              | 247.36              | 256.67              | 257.03              | 242.13              | 243.07              |
| 3       | Female | Day 1 | 3:00 PM | 199.04              | 191.05              | 193.30              | 198.12              | 209.06              | 183.66              | 182.29              |
| 4       | Female | Day 1 | 3:00 PM | 218.36              | 215.25              | 209.90              | 216.16              | 219.43              | 209.58              | 209.10              |
| 5       | Male   | Day 1 | 3:00 PM | 103.84              | 98.20               | 96.79               | 102.46              | 104.65              | 98.07               | 93.36               |
| 6       | Male   | Day 1 | 3:00 PM | 105.54              | 101.76              | 102.44              | 100.54              | 102.56              | 100.84              | 102.26              |
| 7       | Female | Day 1 | 3:00 PM | 185.76              | 175.07              | 176.37              | 185.81              | 195.33              | 169.95              | 170.63              |
| 8       | Male   | Day 1 | 3:00 PM | 127.61              | 127.84              | 128.49              | 129.47              | 132.76              | 126.78              | 126.78              |
| 1       | Female | Day 1 | 9:00 PM | 203.81              | 201.98              | 220.86              | 221.03              | 222.41              | 209.46              | 206.50              |
| 2       | Female | Day 1 | 9:00 PM | 237.44              | 244.44              | 241.02              | 258.13              | 256.25              | 242.66              | 239.45              |
| 3       | Female | Day 1 | 9:00 PM | 198.60              | 192.29              | 194.24              | 201.62              | 209.32              | 186.52              | 185.98              |
| 4       | Female | Day 1 | 9:00 PM | 209.86              | 210.19              | 201.31              | 217.85              | 213.17              | 202.84              | 203.88              |
| 5       | Male   | Day 1 | 9:00 PM | 108.45              | 104.03              | 102.49              | 107.79              | 106.73              | 102.47              | 99.38               |
| 6       | Male   | Day 1 | 9:00 PM | 108.27              | 105.66              | 105.46              | 108.04              | 106.03              | 104.26              | 104.39              |
| 7       | Female | Day 1 | 9:00 PM | 185.99              | 180.32              | 177.90              | 199.30              | 205.24              | 177.31              | 174.95              |
| 8       | Male   | Day 1 | 9:00 PM | 126.91              | 127.03              | 128.38              | 128.77              | 129.92              | 126.38              | 126.10              |
| 1       | Female | Day 2 | 9:00 AM | 264.97              | 261.77              | 261.65              | 265.87              | 268.24              | 262.17              | 261.99              |
| 2       | Female | Day 2 | 9:00 AM | 235.34              | 232.04              | 226.37              | 233.11              | 221.87              | 223.21              | 228.89              |
| 3       | Female | Day 2 | 9:00 AM | 189.75              | 182.63              | 176.29              | 183.51              | 183.83              | 172.51              | 172.45              |
| 4       | Female | Day 2 | 9:00 AM | 220.60              | 218.73              | 217.07              | 223.49              | 225.16              | 212.20              | 214.80              |
| 5       | Male   | Day 2 | 9:00 AM | 104.80              | 104.12              | 103.15              | 105.59              | 106.82              | 103.95              | 97.98               |
| 6       | Male   | Day 2 | 9:00 AM | 106.13              | 103.15              | 101.12              | 102.46              | 103.78              | 102.59              | 104.23              |
| 7       | Female | Day 2 | 9:00 AM | 159.91              | 152.16              | 149.96              | 168.48              | 164.37              | 154.87              | 148.79              |
| 8       | Male   | Day 2 | 9:00 AM | 127.57              | 127.06              | 127.46              | 129.60              | 128.91              | 127.90              | 127.49              |
| 1       | Female | Day 2 | 3:00 PM | 224.32              | 221.39              | 217.93              | 227.75              | 222.97              | 219.85              | 221.00              |
| 2       | Female | Day 2 | 3:00 PM | 238.85              | 236.30              | 235.32              | 248.48              | 246.69              | 234.79              | 233.09              |
| 3       | Female | Day 2 | 3:00 PM | 200.72              | 195.74              | 193.60              | 195.33              | 204.95              | 182.41              | 181.20              |
| 4       | Female | Day 2 | 3:00 PM | 241.03              | 234.31              | 236.43              | 241.16              | 242.95              | 228.74              | 229.98              |
| 5       | Male   | Day 2 | 3:00 PM | 106.19              | 105.88              | 105.55              | 106.50              | 106.18              | 104.64              | 97.95               |
| 6       | Male   | Day 2 | 3:00 PM | 118.98              | 116.38              | 116.42              | 116.93              | 118.77              | 116.56              | 118.10              |
| 7       | Female | Day 2 | 3:00 PM | 179.04              | 174.12              | 173.59              | 191.08              | 191.13              | 174.36              | 170.31              |
| 8       | Male   | Day 2 | 3:00 PM | 124.73              | 123.17              | 123.36              | 124.36              | 125.49              | 123.96              | 123.38              |
| 1       | Female | Day 2 | 9:00 PM | 221.71              | 218.53              | 220.15              | 221.93              | 221.85              | 214.87              | 221.01              |
| 2       | Female | Day 2 | 9:00 PM | 242.13              | 231.60              | 236.06              | 246.61              | 249.38              | 236.68              | 232.24              |
| 3       | Female | Day 2 | 9:00 PM | 208.73              | 204.79              | 199.55              | 211.42              | 225.44              | 192.73              | 194.77              |
| 4       | Female | Day 2 | 9:00 PM | 232.25              | 230.27              | 227.41              | 231.31              | 236.15              | 222.56              | 223.67              |
| 5       | Male   | Day 2 | 9:00 PM | 104.56              | 103.10              | 102.06              | 103.82              | 106.26              | 99.66               | 96.11               |
| 6       | Male   | Day 2 | 9:00 PM | 112.24              | 112.13              | 110.19              | 110.71              | 111.57              | 107.55              | 109.33              |
| 7       | Female | Day 2 | 9:00 PM | 181.35              | 175.72              | 173.94              | 186.48              | 194.94              | 176.66              | 175.91              |
| 8       | Male   | Day 2 | 9:00 PM | 132.54              | 131.62              | 132.45              | 133.66              | 133.73              | 130.84              | 132.02              |
| 1       | Female | Day 3 | 9:00 AM | 239.21              | 236.72              | 236.02              | 240.91              | 241.87              | 231.29              | 234.44              |
| 2       | Female | Day 3 | 9:00 AM | 238.62              | 232.45              | 233.85              | 243.14              | 241.20              | 236.91              | 228.96              |
| 3       | Female | Day 3 | 9:00 AM | 193.37              | 190.23              | 182.35              | 188.97              | 195.45              | 175.21              | 174.70              |
| 4       | Female | Day 3 | 9:00 AM | 215.18              | 209.77              | 208.14              | 216.92              | 219.46              | 209.93              | 209.51              |
| 5       | Male   | Day 3 | 9:00 AM | 96.21               | 92.58               | 92.15               | 99.49               | 96.97               | 97.50               | 96.85               |
| 6       | Male   | Day 3 | 9:00 AM | 100.99              | 98.92               | 99.76               | 101.28              | 100.20              | 98.31               | 97.74               |
| 7       | Female | Day 3 | 9:00 AM | 160.55              | 150.56              | 152.17              | 169.76              | 176.14              | 159.12              | 155.94              |
| 8       | Male   | Day 3 | 9:00 AM | 130.26              | 128.66              | 129.11              | 130.65              | 131.10              | 129.62              | 129.87              |
| 1       | Female | Day 3 | 3:00 PM | 248.29              | 246.70              | 246.70              | 248.63              | 252.21              | 244.91              | 247.84              |
| 2       | Female | Day 3 | 3:00 PM | 246.62              | 243.21              | 244.04              | 251.71              | 253.45              | 241.93              | 239.32              |
| 3       | Female | Day 3 | 3:00 PM | 201.89              | 193.23              | 197.03              | 210.02              | 211.97              | 188.63              | 185.22              |
| 4       | Female | Day 3 | 3:00 PM | 234.08              | 226.17              | 224.24              | 233.36              | 204.54              | 222.20              | 222.46              |
| 5       | Male   | Day 3 | 3:00 PM | 103.59              | 97.75               | 99.98               | 102.95              | 105.06              | 101.05              | 100.31              |
| 6       | Male   | Day 3 | 3:00 PM | 116.27              | 117.45              | 118.39              | 118.74              | 118.34              | 114.28              | 116.68              |
| 7       | Female | Day 3 | 3:00 PM | 174.45              | 170.84              | 164.92              | 175.02              | 183.89              | 166.77              | 169.93              |
| 8       | Male   | Day 3 | 3:00 PM | 134.50              | 134.57              | 135.55              | 136.45              | 135.40              | 134.56              | 134.45              |
| 1       | Female | Day 3 | 9:00 PM | 226.80              | 224.60              | 224.96              | 231.62              | 226.18              | 224.59              | 223.38              |
| 2       | Female | Day 3 | 9:00 PM | 236.82              | 239.75              | 224.13              | 246.76              | 248.33              | 239.38              | 232.80              |
| 3       | Female | Day 3 | 9:00 PM | 203.78              | 197.26              | 193.27              | 200.06              | 220.34              | 189.81              | 181.92              |
| 4       | Female | Day 3 | 9:00 PM | 220.61              | 214.34              | 218.11              | 224.94              | 231.21              | 213.35              | 213.72              |
| 5       | Male   | Day 3 | 9:00 PM | 99.31               | 97.70               | 97.49               | 97.48               | 102.23              | 99.42               | 96.67               |
| 6       | Male   | Day 3 | 9:00 PM | 110.59              | 109.89              | 109.50              | 113.21              | 114.13              | 109.84              | 112.51              |
| 7       | Female | Day 3 | 9:00 PM | 175.05              | 168.86              | 170.06              | 179.11              | 187.61              | 170.90              | 168.85              |
| 8       | Male   | Day 3 | 9:00 PM | 122.55              | 121.24              | 121.60              | 123.63              | 124.91              | 121.98              | 123.26              |
