# Supplementary material for: Variability in Vowel Production within and between Days
Source: PubMed Central journal article supplement (PMC4558024; doi:10.1371/journal.pone.0136791), 2015-09-02
Supplement: pone.0136791.s002.pdf [file pone.0136791.s002.pdf]

| Subject | Sex    | Day   | Time    | Average F1 for /IH/ | Average F1 for /EH/ | Average F1 for /UH/ | Average F1 for /EE/ | Average F1 for /OO/ | Average F1 for /AE/ | Average F1 for /AH/ |
|---------|--------|-------|---------|---------------------|---------------------|---------------------|---------------------|---------------------|---------------------|---------------------|
| 1       | Female | Day 1 | 9:00 AM | 629.19              | 749.74              | 766.76              | 354.03              | 382.52              | 834.11              | 883.05              |
| 2       | Female | Day 1 | 9:00 AM | 650.67              | 902.75              | 864.30              | 437.06              | 442.81              | 919.66              | 1069.33             |
| 3       | Female | Day 1 | 9:00 AM | 530.59              | 828.20              | 717.16              | 355.07              | 352.73              | 875.23              | 914.37              |
| 4       | Female | Day 1 | 9:00 AM | 597.70              | 790.68              | 765.84              | 401.06              | 426.09              | 899.93              | 859.00              |
| 5       | Male   | Day 1 | 9:00 AM | 377.52              | 572.11              | 631.71              | 241.22              | 325.91              | 753.77              | 833.20              |
| 6       | Male   | Day 1 | 9:00 AM | 449.15              | 620.16              | 572.72              | 287.41              | 328.11              | 765.65              | 858.02              |
| 7       | Female | Day 1 | 9:00 AM | 473.30              | 728.23              | 688.75              | 349.25              | 360.29              | 961.97              | 903.14              |
| 8       | Male   | Day 1 | 9:00 AM | 446.35              | 624.77              | 573.52              | 263.95              | 288.98              | 766.72              | 751.29              |
| 1       | Female | Day 1 | 3:00 PM | 625.17              | 789.59              | 801.96              | 344.82              | 393.99              | 862.39              | 922.15              |
| 2       | Female | Day 1 | 3:00 PM | 665.63              | 890.79              | 902.26              | 430.86              | 440.39              | 910.32              | 1034.24             |
| 3       | Female | Day 1 | 3:00 PM | 598.14              | 884.61              | 807.31              | 377.94              | 361.41              | 919.96              | 985.33              |
| 4       | Female | Day 1 | 3:00 PM | 562.54              | 758.45              | 742.75              | 392.02              | 421.69              | 899.57              | 814.09              |
| 5       | Male   | Day 1 | 3:00 PM | 387.36              | 567.65              | 705.75              | 246.14              | 351.75              | 740.06              | 874.80              |
| 6       | Male   | Day 1 | 3:00 PM | 480.47              | 639.17              | 609.44              | 274.09              | 341.82              | 790.38              | 863.81              |
| 7       | Female | Day 1 | 3:00 PM | 495.11              | 811.81              | 753.39              | 346.91              | 376.82              | 1009.88             | 909.42              |
| 8       | Male   | Day 1 | 3:00 PM | 423.19              | 597.90              | 572.66              | 266.18              | 280.97              | 701.78              | 704.20              |
| 1       | Female | Day 1 | 9:00 PM | 617.39              | 769.46              | 768.71              | 366.64              | 403.66              | 828.83              | 918.75              |
| 2       | Female | Day 1 | 9:00 PM | 695.76              | 889.57              | 905.50              | 438.57              | 456.80              | 924.63              | 1063.91             |
| 3       | Female | Day 1 | 9:00 PM | 640.41              | 904.85              | 851.78              | 379.98              | 376.23              | 934.50              | 971.64              |
| 4       | Female | Day 1 | 9:00 PM | 548.22              | 764.71              | 768.35              | 396.43              | 403.81              | 897.61              | 855.24              |
| 5       | Male   | Day 1 | 9:00 PM | 371.41              | 579.10              | 699.46              | 240.64              | 365.04              | 725.33              | 870.52              |
| 6       | Male   | Day 1 | 9:00 PM | 467.83              | 644.70              | 636.73              | 245.77              | 303.26              | 762.03              | 837.78              |
| 7       | Female | Day 1 | 9:00 PM | 524.80              | 834.48              | 767.91              | 352.85              | 367.57              | 987.36              | 921.86              |
| 8       | Male   | Day 1 | 9:00 PM | 452.54              | 581.27              | 563.66              | 288.51              | 306.22              | 698.08              | 713.85              |
| 1       | Female | Day 2 | 9:00 AM | 611.72              | 759.38              | 793.54              | 313.60              | 363.51              | 840.91              | 973.92              |
| 2       | Female | Day 2 | 9:00 AM | 702.03              | 840.39              | 825.10              | 448.35              | 441.52              | 892.70              | 1060.38             |
| 3       | Female | Day 2 | 9:00 AM | 615.05              | 888.87              | 821.25              | 366.24              | 347.48              | 918.03              | 960.73              |
| 4       | Female | Day 2 | 9:00 AM | 527.47              | 755.06              | 739.58              | 404.25              | 427.13              | 914.03              | 856.73              |
| 5       | Male   | Day 2 | 9:00 AM | 371.84              | 566.10              | 628.36              | 277.43              | 393.09              | 712.68              | 829.01              |
| 6       | Male   | Day 2 | 9:00 AM | 482.56              | 644.74              | 676.70              | 277.81              | 321.90              | 788.70              | 910.15              |
| 7       | Female | Day 2 | 9:00 AM | 494.29              | 774.56              | 714.91              | 337.79              | 336.11              | 928.02              | 900.45              |
| 8       | Male   | Day 2 | 9:00 AM | 436.78              | 588.12              | 589.66              | 285.92              | 336.82              | 722.45              | 747.81              |
| 1       | Female | Day 2 | 3:00 PM | 612.24              | 757.33              | 747.19              | 355.71              | 415.84              | 846.30              | 900.62              |
| 2       | Female | Day 2 | 3:00 PM | 679.81              | 851.93              | 871.16              | 465.07              | 459.00              | 927.98              | 1051.82             |
| 3       | Female | Day 2 | 3:00 PM | 603.47              | 923.62              | 852.13              | 358.44              | 373.58              | 939.79              | 984.07              |
| 4       | Female | Day 2 | 3:00 PM | 521.76              | 740.19              | 756.69              | 391.84              | 445.24              | 866.28              | 841.81              |
| 5       | Male   | Day 2 | 3:00 PM | 378.84              | 571.75              | 731.80              | 239.89              | 456.34              | 735.45              | 885.91              |
| 6       | Male   | Day 2 | 3:00 PM | 474.08              | 629.23              | 640.13              | 283.51              | 334.73              | 761.71              | 885.71              |
| 7       | Female | Day 2 | 3:00 PM | 487.75              | 772.02              | 700.21              | 317.12              | 361.59              | 946.89              | 919.11              |
| 8       | Male   | Day 2 | 3:00 PM | 476.23              | 596.62              | 633.16              | 306.71              | 339.27              | 734.14              | 732.76              |
| 1       | Female | Day 2 | 9:00 PM | 620.62              | 775.09              | 763.91              | 354.05              | 422.52              | 861.73              | 919.92              |
| 2       | Female | Day 2 | 9:00 PM | 681.08              | 866.84              | 852.67              | 457.87              | 456.62              | 892.61              | 1046.64             |
| 3       | Female | Day 2 | 9:00 PM | 627.88              | 928.28              | 870.28              | 406.28              | 414.38              | 960.92              | 991.53              |
| 4       | Female | Day 2 | 9:00 PM | 540.60              | 805.01              | 765.02              | 400.29              | 433.78              | 927.89              | 864.00              |
| 5       | Male   | Day 2 | 9:00 PM | 402.45              | 594.67              | 692.14              | 259.74              | 520.73              | 740.56              | 889.19              |
| 6       | Male   | Day 2 | 9:00 PM | 469.85              | 626.12              | 654.49              | 273.99              | 318.39              | 798.06              | 866.99              |
| 7       | Female | Day 2 | 9:00 PM | 536.05              | 791.50              | 766.10              | 369.77              | 373.62              | 964.38              | 830.97              |
| 8       | Male   | Day 2 | 9:00 PM | 448.51              | 592.93              | 618.75              | 280.76              | 336.94              | 720.76              | 716.86              |
| 1       | Female | Day 3 | 9:00 AM | 594.29              | 749.00              | 742.69              | 345.59              | 380.58              | 858.08              | 936.73              |
| 2       | Female | Day 3 | 9:00 AM | 661.38              | 854.07              | 821.73              | 453.37              | 451.75              | 910.67              | 1024.73             |
| 3       | Female | Day 3 | 9:00 AM | 606.85              | 915.33              | 837.13              | 371.68              | 368.95              | 935.16              | 965.54              |
| 4       | Female | Day 3 | 9:00 AM | 518.08              | 763.54              | 756.83              | 388.58              | 412.16              | 959.51              | 822.69              |
| 5       | Male   | Day 3 | 9:00 AM | 398.27              | 600.03              | 709.21              | 311.93              | 442.50              | 723.98              | 881.46              |
| 6       | Male   | Day 3 | 9:00 AM | 468.20              | 631.77              | 667.97              | 294.02              | 345.24              | 800.96              | 841.56              |
| 7       | Female | Day 3 | 9:00 AM | 492.96              | 774.02              | 723.55              | 331.34              | 352.44              | 952.87              | 864.08              |
| 8       | Male   | Day 3 | 9:00 AM | 462.01              | 600.67              | 618.91              | 298.58              | 326.91              | 720.38              | 720.72              |
| 1       | Female | Day 3 | 3:00 PM | 620.40              | 729.34              | 726.56              | 357.23              | 427.91              | 853.77              | 950.90              |
| 2       | Female | Day 3 | 3:00 PM | 638.21              | 869.62              | 830.55              | 452.87              | 463.91              | 894.03              | 1005.95             |
| 3       | Female | Day 3 | 3:00 PM | 636.61              | 950.51              | 906.26              | 378.10              | 387.02              | 992.31              | 1002.83             |
| 4       | Female | Day 3 | 3:00 PM | 523.65              | 766.49              | 770.99              | 382.51              | 424.79              | 916.53              | 881.50              |
| 5       | Male   | Day 3 | 3:00 PM | 393.68              | 614.78              | 724.72              | 263.26              | 384.81              | 720.40              | 919.11              |
| 6       | Male   | Day 3 | 3:00 PM | 484.92              | 659.63              | 699.44              | 276.82              | 323.31              | 864.79              | 941.32              |
| 7       | Female | Day 3 | 3:00 PM | 524.24              | 826.77              | 729.05              | 349.33              | 351.01              | 955.26              | 832.06              |
| 8       | Male   | Day 3 | 3:00 PM | 469.44              | 591.86              | 608.26              | 299.40              | 330.42              | 692.08              | 711.69              |
| 1       | Female | Day 3 | 9:00 PM | 615.14              | 761.00              | 753.41              | 356.23              | 414.34              | 856.74              | 930.90              |
| 2       | Female | Day 3 | 9:00 PM | 720.58              | 892.38              | 883.28              | 450.40              | 441.53              | 910.11              | 999.21              |
| 3       | Female | Day 3 | 9:00 PM | 605.07              | 932.46              | 870.67              | 381.88              | 379.49              | 944.43              | 989.60              |
| 4       | Female | Day 3 | 9:00 PM | 535.09              | 733.21              | 767.91              | 407.46              | 416.85              | 892.81              | 854.32              |
| 5       | Male   | Day 3 | 9:00 PM | 390.32              | 585.31              | 698.90              | 266.04              | 377.43              | 705.35              | 889.48              |
| 6       | Male   | Day 3 | 9:00 PM | 487.41              | 661.32              | 720.93              | 266.48              | 319.67              | 824.49              | 979.25              |
| 7       | Female | Day 3 | 9:00 PM | 548.20              | 816.51              | 776.50              | 404.09              | 394.29              | 958.58              | 838.45              |
| 8       | Male   | Day 3 | 9:00 PM | 461.22              | 594.00              | 610.71              | 293.29              | 336.04              | 682.12              | 677.58              |
