# Supplementary material for: Variability in Vowel Production within and between Days
Source: PubMed Central journal article supplement (PMC4558024; doi:10.1371/journal.pone.0136791), 2015-09-02
Supplement: pone.0136791.s003.pdf [file pone.0136791.s003.pdf]

| Subject | Sex    | Day   | Time    | Average F2 for /IH/ | Average F2 for /EH/ | Average F2 for /UH/ | Average F2 for /EE/ | Average F2 for /OO/ | Average F2 for /AE/ | Average F2 for /AH/ |
|---------|--------|-------|---------|---------------------|---------------------|---------------------|---------------------|---------------------|---------------------|---------------------|
| 1       | Female | Day 1 | 9:00 AM | 2077.26             | 1860.58             | 1461.00             | 2763.04             | 1045.20             | 1827.90             | 1505.81             |
| 2       | Female | Day 1 | 9:00 AM | 2139.96             | 1868.26             | 1735.96             | 2566.46             | 1250.84             | 1864.47             | 1810.18             |
| 3       | Female | Day 1 | 9:00 AM | 2115.95             | 1834.23             | 1362.16             | 2761.19             | 1132.82             | 1737.17             | 1420.55             |
| 4       | Female | Day 1 | 9:00 AM | 2036.06             | 1824.62             | 1327.61             | 2491.44             | 1211.25             | 1857.08             | 1183.92             |
| 5       | Male   | Day 1 | 9:00 AM | 2297.21             | 2095.69             | 1248.57             | 2461.75             | 1038.86             | 1981.80             | 1271.33             |
| 6       | Male   | Day 1 | 9:00 AM | 1924.71             | 1778.84             | 1273.64             | 2361.07             | 1013.92             | 1750.04             | 1315.06             |
| 7       | Female | Day 1 | 9:00 AM | 2414.19             | 2150.18             | 1437.79             | 2809.36             | 846.64              | 1958.82             | 1358.49             |
| 8       | Male   | Day 1 | 9:00 AM | 1833.08             | 1709.98             | 1247.18             | 2251.46             | 926.70              | 1566.75             | 1233.38             |
| 1       | Female | Day 1 | 3:00 PM | 2085.29             | 1660.94             | 1468.95             | 2584.99             | 1085.43             | 1487.74             | 1520.91             |
| 2       | Female | Day 1 | 3:00 PM | 1887.28             | 1669.84             | 1720.55             | 2291.03             | 1238.19             | 1619.68             | 1666.88             |
| 3       | Female | Day 1 | 3:00 PM | 2233.03             | 1895.21             | 1458.66             | 2795.50             | 987.28              | 1813.98             | 1486.00             |
| 4       | Female | Day 1 | 3:00 PM | 1639.77             | 1767.92             | 1327.64             | 2566.94             | 1251.37             | 1860.21             | 1160.71             |
| 5       | Male   | Day 1 | 3:00 PM | 2346.89             | 2158.58             | 1241.79             | 2509.30             | 1173.90             | 2074.97             | 1365.88             |
| 6       | Male   | Day 1 | 3:00 PM | 1921.04             | 1831.00             | 1224.58             | 2412.60             | 960.70              | 1679.73             | 1259.05             |
| 7       | Female | Day 1 | 3:00 PM | 2390.51             | 2060.78             | 1398.44             | 2710.35             | 800.75              | 1940.15             | 1308.45             |
| 8       | Male   | Day 1 | 3:00 PM | 1846.65             | 1674.89             | 1279.05             | 2231.76             | 896.75              | 1576.10             | 1289.51             |
| 1       | Female | Day 1 | 9:00 PM | 2019.66             | 1837.90             | 1487.71             | 2715.62             | 1168.97             | 1731.24             | 1610.35             |
| 2       | Female | Day 1 | 9:00 PM | 2232.30             | 1855.76             | 1720.52             | 2667.41             | 1324.05             | 1836.52             | 1740.14             |
| 3       | Female | Day 1 | 9:00 PM | 2213.36             | 1881.90             | 1408.53             | 2743.37             | 1028.61             | 1829.75             | 1461.05             |
| 4       | Female | Day 1 | 9:00 PM | 1859.34             | 1624.48             | 1372.38             | 2561.43             | 1209.82             | 1770.83             | 1223.20             |
| 5       | Male   | Day 1 | 9:00 PM | 2452.35             | 2159.32             | 1326.43             | 2536.22             | 1190.48             | 2166.62             | 1344.04             |
| 6       | Male   | Day 1 | 9:00 PM | 1972.40             | 1862.78             | 1217.66             | 2454.36             | 893.94              | 1765.57             | 1389.88             |
| 7       | Female | Day 1 | 9:00 PM | 2398.30             | 2025.49             | 1411.27             | 2766.36             | 741.92              | 1956.20             | 1335.31             |
| 8       | Male   | Day 1 | 9:00 PM | 1810.04             | 1680.82             | 1267.40             | 2221.05             | 927.55              | 1577.91             | 1251.19             |
| 1       | Female | Day 2 | 9:00 AM | 2064.27             | 1646.60             | 1494.98             | 2584.78             | 1114.01             | 1662.28             | 1627.58             |
| 2       | Female | Day 2 | 9:00 AM | 2064.36             | 1885.41             | 1675.27             | 2532.04             | 1232.98             | 1897.29             | 1860.60             |
| 3       | Female | Day 2 | 9:00 AM | 2172.58             | 1830.14             | 1363.34             | 2798.37             | 996.61              | 1711.90             | 1346.33             |
| 4       | Female | Day 2 | 9:00 AM | 1628.79             | 1664.31             | 1334.65             | 2713.88             | 1224.51             | 1666.08             | 1189.17             |
| 5       | Male   | Day 2 | 9:00 AM | 2328.18             | 2048.25             | 1328.32             | 2413.47             | 1331.51             | 2122.90             | 1311.04             |
| 6       | Male   | Day 2 | 9:00 AM | 1969.48             | 1832.38             | 1242.17             | 2427.32             | 944.00              | 1751.29             | 1328.91             |
| 7       | Female | Day 2 | 9:00 AM | 1903.52             | 1576.83             | 1386.86             | 2351.92             | 745.47              | 1473.25             | 1263.82             |
| 8       | Male   | Day 2 | 9:00 AM | 1878.01             | 1688.58             | 1240.59             | 2261.15             | 969.58              | 1517.11             | 1249.41             |
| 1       | Female | Day 2 | 3:00 PM | 1988.86             | 1784.37             | 1398.12             | 2731.85             | 1106.38             | 1717.82             | 1539.95             |
| 2       | Female | Day 2 | 3:00 PM | 1980.34             | 1801.03             | 1707.39             | 2360.45             | 1384.84             | 1880.56             | 1711.12             |
| 3       | Female | Day 2 | 3:00 PM | 2189.94             | 1842.79             | 1376.20             | 2784.96             | 1022.48             | 1794.80             | 1337.81             |
| 4       | Female | Day 2 | 3:00 PM | 2092.80             | 1957.10             | 1363.93             | 2329.24             | 1309.27             | 1801.27             | 1185.22             |
| 5       | Male   | Day 2 | 3:00 PM | 2318.47             | 2026.31             | 1278.26             | 2417.37             | 1927.39             | 2123.57             | 1317.59             |
| 6       | Male   | Day 2 | 3:00 PM | 1940.65             | 1832.39             | 1272.87             | 2366.55             | 941.21              | 1678.37             | 1257.33             |
| 7       | Female | Day 2 | 3:00 PM | 2405.50             | 2017.00             | 1398.29             | 2665.11             | 706.83              | 1916.30             | 1325.64             |
| 8       | Male   | Day 2 | 3:00 PM | 1860.71             | 1763.30             | 1244.60             | 2274.40             | 976.71              | 1590.26             | 1240.02             |
| 1       | Female | Day 2 | 9:00 PM | 1978.12             | 1781.49             | 1409.77             | 2632.60             | 1052.18             | 1784.09             | 1528.65             |
| 2       | Female | Day 2 | 9:00 PM | 1999.09             | 1818.29             | 1696.48             | 2240.22             | 1334.22             | 1836.27             | 1785.33             |
| 3       | Female | Day 2 | 9:00 PM | 2170.33             | 1849.48             | 1371.63             | 2695.40             | 1061.25             | 1817.27             | 1365.35             |
| 4       | Female | Day 2 | 9:00 PM | 2202.27             | 1977.28             | 1344.18             | 2181.96             | 1235.00             | 1846.52             | 1180.89             |
| 5       | Male   | Day 2 | 9:00 PM | 2305.62             | 2065.04             | 1268.70             | 2470.60             | 2035.82             | 2171.64             | 1323.83             |
| 6       | Male   | Day 2 | 9:00 PM | 1976.24             | 1836.14             | 1259.70             | 2412.77             | 906.74              | 1649.32             | 1228.78             |
| 7       | Female | Day 2 | 9:00 PM | 2292.62             | 1947.77             | 1414.85             | 2798.85             | 769.84              | 1826.94             | 1213.58             |
| 8       | Male   | Day 2 | 9:00 PM | 1861.18             | 1759.73             | 1239.04             | 2288.33             | 940.51              | 1605.10             | 1228.78             |
| 1       | Female | Day 3 | 9:00 AM | 2085.65             | 1784.00             | 1408.36             | 2725.26             | 972.20              | 1737.06             | 1476.09             |
| 2       | Female | Day 3 | 9:00 AM | 2184.00             | 1923.06             | 1739.45             | 2217.93             | 1370.09             | 2086.07             | 1776.22             |
| 3       | Female | Day 3 | 9:00 AM | 2142.06             | 1810.63             | 1369.00             | 2718.53             | 1001.49             | 1743.35             | 1366.10             |
| 4       | Female | Day 3 | 9:00 AM | 1747.84             | 1786.87             | 1345.67             | 2504.19             | 1203.04             | 1836.54             | 1164.46             |
| 5       | Male   | Day 3 | 9:00 AM | 2257.69             | 1955.76             | 1284.20             | 2318.02             | 1599.15             | 2042.40             | 1415.32             |
| 6       | Male   | Day 3 | 9:00 AM | 1911.56             | 1759.73             | 1220.85             | 2388.27             | 949.63              | 1664.69             | 1209.29             |
| 7       | Female | Day 3 | 9:00 AM | 2378.39             | 2092.13             | 1412.40             | 2748.51             | 755.99              | 1857.44             | 1205.03             |
| 8       | Male   | Day 3 | 9:00 AM | 1787.37             | 1571.71             | 1221.62             | 2148.47             | 973.83              | 1258.70             | 1199.78             |
| 1       | Female | Day 3 | 3:00 PM | 2032.38             | 1825.62             | 1487.91             | 2633.74             | 1170.33             | 1921.19             | 1572.67             |
| 2       | Female | Day 3 | 3:00 PM | 2199.12             | 1798.26             | 1685.10             | 2276.67             | 1334.59             | 1929.66             | 1748.11             |
| 3       | Female | Day 3 | 3:00 PM | 2242.85             | 1918.37             | 1391.84             | 2819.19             | 990.67              | 1817.70             | 1375.27             |
| 4       | Female | Day 3 | 3:00 PM | 1993.66             | 1781.09             | 1368.63             | 2418.80             | 1159.93             | 1675.46             | 1207.28             |
| 5       | Male   | Day 3 | 3:00 PM | 2280.92             | 2040.09             | 1259.23             | 2425.15             | 1295.56             | 2152.49             | 1272.64             |
| 6       | Male   | Day 3 | 3:00 PM | 1966.32             | 1838.45             | 1217.32             | 2379.05             | 915.40              | 1774.96             | 1245.31             |
| 7       | Female | Day 3 | 3:00 PM | 2439.60             | 1837.92             | 1414.03             | 2804.52             | 743.47              | 1903.40             | 1185.54             |
| 8       | Male   | Day 3 | 3:00 PM | 1854.67             | 1730.38             | 1223.78             | 2227.70             | 920.54              | 1575.20             | 1210.26             |
| 1       | Female | Day 3 | 9:00 PM | 2034.68             | 1840.01             | 1403.75             | 2781.13             | 1059.61             | 1810.69             | 1463.95             |
| 2       | Female | Day 3 | 9:00 PM | 2096.18             | 1881.10             | 1754.94             | 1904.89             | 1372.30             | 1869.96             | 1738.55             |
| 3       | Female | Day 3 | 9:00 PM | 2178.71             | 1821.57             | 1367.44             | 2569.58             | 1000.54             | 1744.05             | 1361.88             |
| 4       | Female | Day 3 | 9:00 PM | 1405.67             | 1482.34             | 1390.67             | 2749.19             | 1226.33             | 1503.61             | 1199.39             |
| 5       | Male   | Day 3 | 9:00 PM | 2330.29             | 2053.56             | 1203.09             | 2438.01             | 1400.01             | 2146.35             | 1203.61             |
| 6       | Male   | Day 3 | 9:00 PM | 2027.21             | 1848.43             | 1229.40             | 2467.97             | 861.16              | 1742.73             | 1280.61             |
| 7       | Female | Day 3 | 9:00 PM | 2429.94             | 2029.14             | 1426.77             | 2854.61             | 787.01              | 1938.51             | 1201.49             |
| 8       | Male   | Day 3 | 9:00 PM | 1830.37             | 1714.76             | 1227.24             | 2201.00             | 949.54              | 1571.94             | 1228.42             |
