# Supplementary material for: Variability in Vowel Production within and between Days
Source: PubMed Central journal article supplement (PMC4558024; doi:10.1371/journal.pone.0136791), 2015-09-02
Supplement: pone.0136791.s004.pdf [file pone.0136791.s004.pdf]

| Subject | Sex    | Day   | Time    | Average F3 for /IH/ | Average F3 for /EH/ | Average F3 for /UH/ | Average F3 for /EE/ | Average F3 for /OO/ | Average F3 for /AE/ | Average F3 for /AH/ |
|---------|--------|-------|---------|---------------------|---------------------|---------------------|---------------------|---------------------|---------------------|---------------------|
| 1       | Female | Day 1 | 9:00 AM | 3103.08             | 3061.28             | 3124.98             | 3374.20             | 3172.36             | 2938.09             | 2848.74             |
| 2       | Female | Day 1 | 9:00 AM | 2933.41             | 2807.98             | 3174.76             | 3409.66             | 2883.43             | 2584.25             | 2798.57             |
| 3       | Female | Day 1 | 9:00 AM | 2976.21             | 3005.57             | 3045.16             | 3239.11             | 2570.13             | 2862.13             | 2837.00             |
| 4       | Female | Day 1 | 9:00 AM | 2838.24             | 2788.74             | 3093.90             | 3137.26             | 2777.63             | 2638.56             | 3111.62             |
| 5       | Male   | Day 1 | 9:00 AM | 2767.10             | 2706.20             | 2715.32             | 3191.59             | 2765.65             | 2548.54             | 2669.07             |
| 6       | Male   | Day 1 | 9:00 AM | 2713.25             | 2650.43             | 2644.76             | 2924.77             | 2452.63             | 2667.73             | 2890.96             |
| 7       | Female | Day 1 | 9:00 AM | 3207.09             | 3074.47             | 3147.92             | 3511.55             | 2850.92             | 2823.27             | 2768.28             |
| 8       | Male   | Day 1 | 9:00 AM | 2629.34             | 2418.23             | 2604.44             | 2732.13             | 2422.74             | 2330.35             | 2277.95             |
| 1       | Female | Day 1 | 3:00 PM | 3047.73             | 2698.93             | 2988.67             | 3184.31             | 3141.52             | 2450.40             | 2698.72             |
| 2       | Female | Day 1 | 3:00 PM | 2814.22             | 2650.10             | 3067.94             | 3381.61             | 2938.79             | 2526.19             | 2625.66             |
| 3       | Female | Day 1 | 3:00 PM | 3109.10             | 2981.42             | 3158.91             | 3314.67             | 2631.13             | 2922.60             | 2967.59             |
| 4       | Female | Day 1 | 3:00 PM | 2707.69             | 2825.89             | 3025.98             | 3192.75             | 2810.56             | 2818.81             | 3033.85             |
| 5       | Male   | Day 1 | 3:00 PM | 2842.56             | 2763.41             | 2778.03             | 3082.38             | 2796.58             | 2683.55             | 2716.06             |
| 6       | Male   | Day 1 | 3:00 PM | 2729.01             | 2684.14             | 2672.58             | 3023.13             | 2471.20             | 2763.52             | 2863.51             |
| 7       | Female | Day 1 | 3:00 PM | 3161.37             | 2975.11             | 3081.63             | 3509.46             | 2727.24             | 2695.51             | 2690.36             |
| 8       | Male   | Day 1 | 3:00 PM | 2620.75             | 2506.01             | 2646.97             | 2756.30             | 2460.06             | 2222.42             | 2326.41             |
| 1       | Female | Day 1 | 9:00 PM | 2924.30             | 2847.73             | 2974.11             | 3264.49             | 3013.42             | 2777.98             | 2858.75             |
| 2       | Female | Day 1 | 9:00 PM | 3110.93             | 2903.67             | 3102.51             | 3475.55             | 3049.29             | 2689.23             | 2741.37             |
| 3       | Female | Day 1 | 9:00 PM | 3080.11             | 2920.35             | 3114.19             | 3305.08             | 2666.71             | 2912.94             | 2933.01             |
| 4       | Female | Day 1 | 9:00 PM | 2797.45             | 2557.53             | 3089.86             | 3233.13             | 2892.35             | 2755.31             | 3056.09             |
| 5       | Male   | Day 1 | 9:00 PM | 2920.06             | 2771.20             | 2785.16             | 3217.34             | 2868.13             | 2734.10             | 2767.10             |
| 6       | Male   | Day 1 | 9:00 PM | 2767.88             | 2650.92             | 2721.88             | 3210.86             | 2475.21             | 2749.45             | 2795.43             |
| 7       | Female | Day 1 | 9:00 PM | 3259.55             | 2824.32             | 3170.32             | 3707.19             | 2782.55             | 2729.99             | 2740.46             |
| 8       | Male   | Day 1 | 9:00 PM | 2607.11             | 2580.11             | 2650.51             | 2715.78             | 2496.35             | 2209.36             | 2438.74             |
| 1       | Female | Day 2 | 9:00 AM | 3025.60             | 2698.95             | 3058.01             | 3158.41             | 3100.70             | 2701.36             | 2937.33             |
| 2       | Female | Day 2 | 9:00 AM | 2912.06             | 2775.38             | 3072.42             | 3443.90             | 2812.22             | 2725.53             | 2910.01             |
| 3       | Female | Day 2 | 9:00 AM | 3062.96             | 2913.42             | 3039.03             | 3303.41             | 2648.40             | 2865.42             | 2825.48             |
| 4       | Female | Day 2 | 9:00 AM | 2626.22             | 2626.41             | 3072.87             | 3181.24             | 2940.01             | 2636.30             | 3089.52             |
| 5       | Male   | Day 2 | 9:00 AM | 2821.02             | 2680.32             | 2761.71             | 3050.31             | 2842.03             | 2676.48             | 2739.64             |
| 6       | Male   | Day 2 | 9:00 AM | 2707.90             | 2653.37             | 2793.82             | 3091.41             | 2606.56             | 2683.02             | 2930.28             |
| 7       | Female | Day 2 | 9:00 AM | 2667.92             | 2397.11             | 3126.97             | 3489.41             | 2707.56             | 2169.69             | 2684.38             |
| 8       | Male   | Day 2 | 9:00 AM | 2698.74             | 2564.10             | 2675.64             | 2801.28             | 2511.60             | 2382.20             | 2493.34             |
| 1       | Female | Day 2 | 3:00 PM | 2901.94             | 2836.71             | 2904.40             | 3200.83             | 2874.41             | 2550.20             | 2629.95             |
| 2       | Female | Day 2 | 3:00 PM | 2731.54             | 2665.99             | 3076.37             | 3260.60             | 2909.48             | 2679.24             | 2836.10             |
| 3       | Female | Day 2 | 3:00 PM | 3054.10             | 2995.67             | 3163.51             | 3296.20             | 2754.47             | 2898.46             | 2887.67             |
| 4       | Female | Day 2 | 3:00 PM | 2604.70             | 2659.57             | 3078.08             | 3025.57             | 2871.18             | 2509.76             | 3146.65             |
| 5       | Male   | Day 2 | 3:00 PM | 2900.35             | 2695.02             | 2768.37             | 3097.25             | 3132.15             | 2745.61             | 2830.45             |
| 6       | Male   | Day 2 | 3:00 PM | 2671.96             | 2601.45             | 2674.36             | 2966.89             | 2409.58             | 2572.08             | 2867.48             |
| 7       | Female | Day 2 | 3:00 PM | 3222.77             | 2742.98             | 3118.76             | 3785.50             | 2837.41             | 2658.60             | 2630.13             |
| 8       | Male   | Day 2 | 3:00 PM | 2707.30             | 2658.29             | 2742.97             | 2847.10             | 2536.95             | 2521.32             | 2549.73             |
| 1       | Female | Day 2 | 9:00 PM | 2820.84             | 2773.59             | 2822.31             | 3018.54             | 2952.45             | 2442.95             | 2551.99             |
| 2       | Female | Day 2 | 9:00 PM | 2910.19             | 2702.75             | 3030.34             | 3382.08             | 2834.03             | 2596.10             | 2949.88             |
| 3       | Female | Day 2 | 9:00 PM | 3000.91             | 2880.00             | 3156.92             | 3131.12             | 2693.97             | 2861.70             | 2978.27             |
| 4       | Female | Day 2 | 9:00 PM | 2595.21             | 2568.54             | 3099.28             | 3103.91             | 2890.45             | 2491.05             | 3122.19             |
| 5       | Male   | Day 2 | 9:00 PM | 2869.84             | 2702.52             | 2684.51             | 3072.72             | 3187.94             | 2739.52             | 2755.14             |
| 6       | Male   | Day 2 | 9:00 PM | 2708.48             | 2660.58             | 2683.62             | 2987.01             | 2538.55             | 2637.94             | 2794.51             |
| 7       | Female | Day 2 | 9:00 PM | 3039.43             | 2599.04             | 3252.07             | 3736.46             | 2915.85             | 2364.57             | 2756.52             |
| 8       | Male   | Day 2 | 9:00 PM | 2637.76             | 2595.41             | 2686.06             | 2846.14             | 2573.95             | 2413.65             | 2602.90             |
| 1       | Female | Day 3 | 9:00 AM | 3098.36             | 2753.44             | 3021.99             | 3280.46             | 3096.39             | 2790.92             | 2731.60             |
| 2       | Female | Day 3 | 9:00 AM | 3021.67             | 2823.57             | 3006.46             | 3354.32             | 2879.75             | 2938.72             | 2852.08             |
| 3       | Female | Day 3 | 9:00 AM | 2977.87             | 2918.76             | 3086.60             | 3251.60             | 2697.56             | 2801.95             | 2847.87             |
| 4       | Female | Day 3 | 9:00 AM | 2676.29             | 2785.43             | 3123.05             | 3122.63             | 2914.86             | 2806.72             | 3140.97             |
| 5       | Male   | Day 3 | 9:00 AM | 2809.37             | 2604.13             | 2597.73             | 2959.21             | 2935.24             | 2627.63             | 2761.49             |
| 6       | Male   | Day 3 | 9:00 AM | 2702.24             | 2611.50             | 2751.49             | 2980.90             | 2547.01             | 2751.52             | 2815.79             |
| 7       | Female | Day 3 | 9:00 AM | 3354.04             | 3152.38             | 3292.37             | 3686.34             | 2885.50             | 2768.27             | 2855.38             |
| 8       | Male   | Day 3 | 9:00 AM | 2471.67             | 2281.88             | 2482.43             | 2657.65             | 2553.29             | 1922.91             | 2108.02             |
| 1       | Female | Day 3 | 3:00 PM | 3092.35             | 2984.18             | 3085.57             | 3230.81             | 3159.69             | 2975.05             | 2920.21             |
| 2       | Female | Day 3 | 3:00 PM | 2975.89             | 2409.21             | 2897.92             | 3256.85             | 2947.04             | 2628.67             | 2785.41             |
| 3       | Female | Day 3 | 3:00 PM | 3051.23             | 2903.40             | 3127.13             | 3262.72             | 2688.21             | 2808.05             | 3076.38             |
| 4       | Female | Day 3 | 3:00 PM | 2635.86             | 2544.19             | 3157.87             | 3091.21             | 2893.74             | 2441.14             | 3193.90             |
| 5       | Male   | Day 3 | 3:00 PM | 2846.68             | 2759.29             | 2803.27             | 3062.44             | 2758.62             | 2711.16             | 2904.96             |
| 6       | Male   | Day 3 | 3:00 PM | 2647.59             | 2670.91             | 2751.53             | 3039.22             | 2518.45             | 2700.54             | 2807.10             |
| 7       | Female | Day 3 | 3:00 PM | 3369.79             | 2815.19             | 3343.44             | 3812.07             | 2810.70             | 2673.66             | 2848.92             |
| 8       | Male   | Day 3 | 3:00 PM | 2657.89             | 2567.48             | 2630.94             | 2820.78             | 2592.31             | 2265.88             | 2393.23             |
| 1       | Female | Day 3 | 9:00 PM | 2971.89             | 2912.68             | 2986.06             | 3267.90             | 3013.98             | 2678.92             | 2874.45             |
| 2       | Female | Day 3 | 9:00 PM | 2936.70             | 2787.15             | 2956.11             | 3262.09             | 2718.01             | 2727.93             | 2838.46             |
| 3       | Female | Day 3 | 9:00 PM | 2947.76             | 2756.91             | 3124.29             | 3144.32             | 2759.37             | 2720.39             | 2908.75             |
| 4       | Female | Day 3 | 9:00 PM | 2551.91             | 2357.61             | 3044.34             | 3193.95             | 2897.23             | 2476.18             | 3111.84             |
| 5       | Male   | Day 3 | 9:00 PM | 2858.77             | 2672.52             | 2709.83             | 3091.72             | 2875.91             | 2671.05             | 2894.51             |
| 6       | Male   | Day 3 | 9:00 PM | 2727.37             | 2691.46             | 2712.42             | 2974.31             | 2532.49             | 2695.88             | 2823.74             |
| 7       | Female | Day 3 | 9:00 PM | 3218.80             | 2909.24             | 3306.66             | 3844.46             | 2838.42             | 2741.66             | 2877.78             |
| 8       | Male   | Day 3 | 9:00 PM | 2608.89             | 2550.87             | 2641.20             | 2873.54             | 2516.32             | 2442.43             | 2387.65             |
