# Supplementary material for: Variability in Vowel Production within and between Days
Source: PubMed Central journal article supplement (PMC4558024; doi:10.1371/journal.pone.0136791), 2015-09-02
Supplement: pone.0136791.s005.pdf [file pone.0136791.s005.pdf]

| Subject | Sex    | Day   | Time    | Average SD in F0 for /IH/ | Average SD in F0 for /EH/ | Average SD in F0 for /UH/ | Average SD in F0 for /EE/ | Average SD in F0 for /OO/ | Average SD in F0 for /AE/ | Average SD in F0 for /AH/ |
|---------|--------|-------|---------|---------------------------|---------------------------|---------------------------|---------------------------|---------------------------|---------------------------|---------------------------|
| 1       | Female | Day 1 | 9:00 AM | 44.99                     | 40.89                     | 42.91                     | 33.19                     | 10.97                     | 41.27                     | 31.15                     |
| 2       | Female | Day 1 | 9:00 AM | 3.67                      | 3.50                      | 4.23                      | 39.68                     | 40.58                     | 3.44                      | 37.41                     |
| 3       | Female | Day 1 | 9:00 AM | 8.90                      | 7.09                      | 6.71                      | 6.28                      | 7.89                      | 5.80                      | 9.80                      |
| 4       | Female | Day 1 | 9:00 AM | 8.01                      | 9.27                      | 8.92                      | 6.91                      | 13.34                     | 5.73                      | 9.43                      |
| 5       | Male   | Day 1 | 9:00 AM | 4.01                      | 2.65                      | 5.42                      | 3.33                      | 3.60                      | 2.66                      | 4.53                      |
| 6       | Male   | Day 1 | 9:00 AM | 14.91                     | 14.79                     | 12.74                     | 14.67                     | 16.47                     | 14.94                     | 15.82                     |
| 7       | Female | Day 1 | 9:00 AM | 8.30                      | 7.85                      | 11.58                     | 12.02                     | 11.77                     | 26.66                     | 11.51                     |
| 8       | Male   | Day 1 | 9:00 AM | 3.93                      | 20.24                     | 4.20                      | 4.34                      | 4.52                      | 4.40                      | 3.68                      |
| 1       | Female | Day 1 | 9:00 PM | 5.40                      | 8.85                      | 3.76                      | 7.12                      | 6.07                      | 3.38                      | 3.04                      |
| 2       | Female | Day 1 | 3:00 PM | 50.52                     | 39.34                     | 9.67                      | 6.37                      | 5.64                      | 6.91                      | 11.58                     |
| 3       | Female | Day 1 | 3:00 PM | 4.73                      | 7.25                      | 5.69                      | 6.23                      | 5.46                      | 4.56                      | 5.25                      |
| 4       | Female | Day 1 | 3:00 PM | 4.07                      | 8.72                      | 8.94                      | 6.98                      | 4.73                      | 6.04                      | 5.15                      |
| 5       | Male   | Day 1 | 3:00 PM | 3.01                      | 2.03                      | 3.51                      | 2.27                      | 4.19                      | 3.35                      | 2.06                      |
| 6       | Male   | Day 1 | 3:00 PM | 3.53                      | 2.81                      | 3.56                      | 2.80                      | 3.49                      | 9.75                      | 2.94                      |
| 7       | Female | Day 1 | 3:00 PM | 7.97                      | 11.64                     | 9.69                      | 7.98                      | 6.21                      | 7.05                      | 3.87                      |
| 8       | Male   | Day 1 | 3:00 PM | 2.92                      | 3.17                      | 1.92                      | 2.20                      | 2.66                      | 1.10                      | 1.90                      |
| 1       | Female | Day 1 | 9:00 PM | 34.05                     | 16.12                     | 8.74                      | 9.93                      | 9.42                      | 10.86                     | 12.88                     |
| 2       | Female | Day 1 | 9:00 PM | 39.63                     | 5.57                      | 8.04                      | 3.96                      | 5.16                      | 5.49                      | 8.42                      |
| 3       | Female | Day 1 | 9:00 PM | 10.55                     | 7.39                      | 10.27                     | 11.39                     | 10.70                     | 6.08                      | 8.39                      |
| 4       | Female | Day 1 | 9:00 PM | 7.58                      | 3.25                      | 11.44                     | 5.80                      | 5.79                      | 6.98                      | 4.89                      |
| 5       | Male   | Day 1 | 9:00 PM | 3.21                      | 3.42                      | 2.21                      | 2.82                      | 2.33                      | 2.20                      | 3.67                      |
| 6       | Male   | Day 1 | 9:00 PM | 3.34                      | 4.27                      | 56.96                     | 6.21                      | 3.80                      | 4.43                      | 25.66                     |
| 7       | Female | Day 1 | 9:00 PM | 6.31                      | 5.28                      | 9.39                      | 6.95                      | 11.66                     | 4.10                      | 5.93                      |
| 8       | Male   | Day 1 | 9:00 PM | 3.00                      | 2.75                      | 2.28                      | 2.67                      | 2.06                      | 3.85                      | 2.31                      |
| 1       | Female | Day 2 | 9:00 AM | 5.85                      | 4.34                      | 6.94                      | 4.89                      | 6.03                      | 8.51                      | 6.86                      |
| 2       | Female | Day 2 | 9:00 AM | 4.83                      | 15.85                     | 2.97                      | 38.62                     | 39.86                     | 40.15                     | 2.99                      |
| 3       | Female | Day 2 | 9:00 AM | 5.53                      | 4.71                      | 7.94                      | 6.83                      | 3.83                      | 4.44                      | 7.61                      |
| 4       | Female | Day 2 | 9:00 AM | 6.75                      | 5.32                      | 6.93                      | 4.69                      | 6.01                      | 4.66                      | 7.54                      |
| 5       | Male   | Day 2 | 9:00 AM | 3.10                      | 5.62                      | 2.84                      | 2.51                      | 2.54                      | 4.01                      | 3.84                      |
| 6       | Male   | Day 2 | 9:00 AM | 3.77                      | 2.17                      | 1.76                      | 2.45                      | 2.80                      | 2.85                      | 9.73                      |
| 7       | Female | Day 2 | 9:00 AM | 7.30                      | 15.70                     | 8.52                      | 7.07                      | 6.70                      | 9.23                      | 5.71                      |
| 8       | Male   | Day 2 | 9:00 AM | 1.78                      | 1.98                      | 1.62                      | 1.81                      | 2.31                      | 1.48                      | 2.34                      |
| 1       | Female | Day 2 | 3:00 PM | 8.69                      | 7.77                      | 7.08                      | 13.32                     | 6.01                      | 5.16                      | 6.08                      |
| 2       | Female | Day 2 | 3:00 PM | 8.44                      | 5.04                      | 4.50                      | 11.98                     | 40.92                     | 5.85                      | 4.17                      |
| 3       | Female | Day 2 | 3:00 PM | 9.74                      | 10.69                     | 8.71                      | 7.16                      | 7.81                      | 4.83                      | 9.33                      |
| 4       | Female | Day 2 | 3:00 PM | 4.57                      | 3.70                      | 5.54                      | 6.99                      | 4.35                      | 3.68                      | 4.48                      |
| 5       | Male   | Day 2 | 3:00 PM | 3.54                      | 3.62                      | 2.86                      | 4.36                      | 2.82                      | 3.99                      | 4.01                      |
| 6       | Male   | Day 2 | 3:00 PM | 3.25                      | 2.93                      | 2.36                      | 2.55                      | 2.23                      | 2.18                      | 5.72                      |
| 7       | Female | Day 2 | 3:00 PM | 10.23                     | 7.06                      | 6.64                      | 11.05                     | 11.52                     | 6.82                      | 5.68                      |
| 8       | Male   | Day 2 | 3:00 PM | 2.32                      | 1.53                      | 1.28                      | 1.70                      | 11.43                     | 2.36                      | 1.71                      |
| 1       | Female | Day 2 | 9:00 PM | 6.80                      | 5.59                      | 7.03                      | 9.53                      | 6.46                      | 13.82                     | 7.41                      |
| 2       | Female | Day 2 | 9:00 PM | 4.43                      | 16.31                     | 5.97                      | 6.75                      | 3.95                      | 7.40                      | 4.87                      |
| 3       | Female | Day 2 | 9:00 PM | 12.50                     | 8.55                      | 6.20                      | 3.80                      | 9.06                      | 5.11                      | 5.33                      |
| 4       | Female | Day 2 | 9:00 PM | 3.91                      | 5.41                      | 3.65                      | 2.79                      | 3.13                      | 3.26                      | 3.08                      |
| 5       | Male   | Day 2 | 9:00 PM | 2.37                      | 2.46                      | 3.27                      | 2.03                      | 2.19                      | 2.19                      | 3.94                      |
| 6       | Male   | Day 2 | 9:00 PM | 2.67                      | 2.81                      | 2.51                      | 2.69                      | 3.06                      | 2.14                      | 2.61                      |
| 7       | Female | Day 2 | 9:00 PM | 8.58                      | 6.60                      | 5.97                      | 9.84                      | 10.33                     | 8.42                      | 9.02                      |
| 8       | Male   | Day 2 | 9:00 PM | 1.79                      | 1.85                      | 1.83                      | 1.56                      | 2.40                      | 1.63                      | 1.85                      |
| 1       | Female | Day 3 | 9:00 AM | 5.04                      | 4.96                      | 4.07                      | 4.76                      | 4.73                      | 6.95                      | 3.47                      |
| 2       | Female | Day 3 | 9:00 AM | 4.35                      | 7.70                      | 6.55                      | 7.26                      | 6.77                      | 4.93                      | 4.91                      |
| 3       | Female | Day 3 | 9:00 AM | 6.66                      | 10.55                     | 8.04                      | 8.60                      | 9.73                      | 5.55                      | 4.52                      |
| 4       | Female | Day 3 | 9:00 AM | 4.65                      | 5.75                      | 5.92                      | 7.10                      | 4.95                      | 7.37                      | 6.10                      |
| 5       | Male   | Day 3 | 9:00 AM | 3.18                      | 3.69                      | 2.53                      | 3.97                      | 2.56                      | 6.51                      | 3.81                      |
| 6       | Male   | Day 3 | 9:00 AM | 2.94                      | 3.12                      | 2.54                      | 5.32                      | 1.37                      | 2.29                      | 1.46                      |
| 7       | Female | Day 3 | 9:00 AM | 13.16                     | 12.60                     | 8.49                      | 9.99                      | 11.54                     | 6.63                      | 15.07                     |
| 8       | Male   | Day 3 | 9:00 AM | 1.45                      | 1.34                      | 1.37                      | 1.39                      | 0.90                      | 1.67                      | 1.34                      |
| 1       | Female | Day 3 | 3:00 PM | 6.23                      | 9.12                      | 9.46                      | 10.38                     | 6.60                      | 9.02                      | 7.69                      |
| 2       | Female | Day 3 | 3:00 PM | 6.14                      | 5.01                      | 6.33                      | 7.38                      | 7.00                      | 5.72                      | 3.37                      |
| 3       | Female | Day 3 | 3:00 PM | 8.35                      | 5.16                      | 6.60                      | 7.84                      | 13.36                     | 7.23                      | 7.72                      |
| 4       | Female | Day 3 | 3:00 PM | 6.93                      | 4.31                      | 5.80                      | 5.40                      | 57.99                     | 15.75                     | 6.28                      |
| 5       | Male   | Day 3 | 3:00 PM | 2.63                      | 3.29                      | 4.45                      | 3.74                      | 3.13                      | 6.12                      | 3.53                      |
| 6       | Male   | Day 3 | 3:00 PM | 2.36                      | 4.73                      | 5.58                      | 3.94                      | 5.73                      | 3.38                      | 3.66                      |
| 7       | Female | Day 3 | 3:00 PM | 16.40                     | 8.64                      | 14.27                     | 18.16                     | 9.86                      | 15.72                     | 14.24                     |
| 8       | Male   | Day 3 | 3:00 PM | 1.25                      | 1.93                      | 1.68                      | 1.30                      | 2.42                      | 1.35                      | 1.17                      |
| 1       | Female | Day 3 | 9:00 PM | 8.31                      | 7.16                      | 9.14                      | 11.04                     | 10.77                     | 10.14                     | 7.95                      |
| 2       | Female | Day 3 | 9:00 PM | 15.94                     | 12.88                     | 39.01                     | 5.42                      | 5.39                      | 7.81                      | 29.91                     |
| 3       | Female | Day 3 | 9:00 PM | 9.19                      | 8.65                      | 5.90                      | 9.88                      | 11.29                     | 7.66                      | 4.62                      |
| 4       | Female | Day 3 | 9:00 PM | 2.32                      | 6.18                      | 9.30                      | 2.81                      | 8.36                      | 12.36                     | 5.82                      |
| 5       | Male   | Day 3 | 9:00 PM | 3.19                      | 3.19                      | 2.77                      | 2.32                      | 2.45                      | 3.60                      | 2.30                      |
| 6       | Male   | Day 3 | 9:00 PM | 42.24                     | 3.16                      | 7.96                      | 5.33                      | 8.19                      | 2.93                      | 2.82                      |
| 7       | Female | Day 3 | 9:00 PM | 6.03                      | 10.41                     | 7.24                      | 16.74                     | 8.24                      | 8.27                      | 4.56                      |
| 8       | Male   | Day 3 | 9:00 PM | 1.56                      | 1.56                      | 1.99                      | 1.30                      | 3.95                      | 2.90                      | 1.92                      |
