# Supplementary material for: Variability in Vowel Production within and between Days
Source: PubMed Central journal article supplement (PMC4558024; doi:10.1371/journal.pone.0136791), 2015-09-02
Supplement: pone.0136791.s006.pdf [file pone.0136791.s006.pdf]

| Subject | Sex    | Day   | Time    | Average SD in F1 for /IH/ | Average SD in F1 for /EH/ | Average SD in F1 for /UH/ | Average SD in F1 for /EE/ | Average SD in F1 for /OO/ | Average SD in F1 for /AE/ | Average SD in F1 for /AH/ |
|---------|--------|-------|---------|---------------------------|---------------------------|---------------------------|---------------------------|---------------------------|---------------------------|---------------------------|
| 1       | Female | Day 1 | 9:00 AM | 30.16                     | 25.26                     | 34.09                     | 18.00                     | 13.14                     | 49.33                     | 48.96                     |
| 2       | Female | Day 1 | 9:00 AM | 41.49                     | 26.80                     | 36.59                     | 19.41                     | 24.78                     | 45.30                     | 37.56                     |
| 3       | Female | Day 1 | 9:00 AM | 22.47                     | 18.09                     | 63.92                     | 13.71                     | 7.99                      | 28.42                     | 25.13                     |
| 4       | Female | Day 1 | 9:00 AM | 24.68                     | 17.57                     | 20.82                     | 22.31                     | 28.48                     | 26.91                     | 20.01                     |
| 5       | Male   | Day 1 | 9:00 AM | 17.05                     | 15.70                     | 15.45                     | 5.55                      | 45.32                     | 39.48                     | 19.13                     |
| 6       | Male   | Day 1 | 9:00 AM | 23.02                     | 18.08                     | 57.82                     | 17.06                     | 13.63                     | 71.32                     | 29.46                     |
| 7       | Female | Day 1 | 9:00 AM | 37.90                     | 41.25                     | 124.86                    | 13.25                     | 15.92                     | 31.51                     | 63.59                     |
| 8       | Male   | Day 1 | 9:00 AM | 19.53                     | 40.80                     | 28.72                     | 7.96                      | 13.79                     | 54.04                     | 34.17                     |
| 1       | Female | Day 1 | 3:00 PM | 25.14                     | 24.60                     | 25.07                     | 32.50                     | 27.25                     | 36.87                     | 34.98                     |
| 2       | Female | Day 1 | 3:00 PM | 52.44                     | 35.27                     | 47.92                     | 16.97                     | 11.79                     | 49.30                     | 61.91                     |
| 3       | Female | Day 1 | 3:00 PM | 21.02                     | 16.25                     | 46.87                     | 12.32                     | 16.44                     | 24.16                     | 25.74                     |
| 4       | Female | Day 1 | 3:00 PM | 18.62                     | 28.87                     | 24.22                     | 14.71                     | 11.30                     | 26.39                     | 31.45                     |
| 5       | Male   | Day 1 | 3:00 PM | 12.40                     | 16.57                     | 42.97                     | 3.94                      | 45.96                     | 35.17                     | 23.70                     |
| 6       | Male   | Day 1 | 3:00 PM | 12.22                     | 17.73                     | 30.14                     | 8.37                      | 7.85                      | 70.31                     | 11.84                     |
| 7       | Female | Day 1 | 3:00 PM | 20.29                     | 42.33                     | 41.46                     | 9.99                      | 16.72                     | 35.23                     | 47.29                     |
| 8       | Male   | Day 1 | 3:00 PM | 64.37                     | 30.85                     | 49.63                     | 12.29                     | 15.33                     | 39.87                     | 27.50                     |
| 1       | Female | Day 1 | 9:00 PM | 46.71                     | 23.08                     | 27.55                     | 24.11                     | 22.04                     | 36.74                     | 44.87                     |
| 2       | Female | Day 1 | 9:00 PM | 46.02                     | 58.89                     | 46.58                     | 23.79                     | 10.74                     | 19.37                     | 38.13                     |
| 3       | Female | Day 1 | 9:00 PM | 20.60                     | 28.14                     | 34.48                     | 13.97                     | 15.19                     | 17.88                     | 31.66                     |
| 4       | Female | Day 1 | 9:00 PM | 30.33                     | 27.31                     | 26.91                     | 14.20                     | 8.54                      | 19.91                     | 34.66                     |
| 5       | Male   | Day 1 | 9:00 PM | 19.23                     | 22.31                     | 28.59                     | 4.87                      | 57.80                     | 27.48                     | 14.75                     |
| 6       | Male   | Day 1 | 9:00 PM | 7.95                      | 12.97                     | 35.47                     | 10.33                     | 14.77                     | 89.98                     | 61.83                     |
| 7       | Female | Day 1 | 9:00 PM | 16.73                     | 27.33                     | 51.36                     | 7.55                      | 12.99                     | 20.37                     | 53.52                     |
| 8       | Male   | Day 1 | 9:00 PM | 39.45                     | 20.12                     | 20.99                     | 23.18                     | 12.17                     | 28.31                     | 36.95                     |
| 1       | Female | Day 2 | 9:00 AM | 35.63                     | 15.48                     | 23.98                     | 14.55                     | 15.39                     | 59.32                     | 36.74                     |
| 2       | Female | Day 2 | 9:00 AM | 23.71                     | 30.79                     | 33.80                     | 19.71                     | 12.76                     | 29.49                     | 42.10                     |
| 3       | Female | Day 2 | 9:00 AM | 34.78                     | 23.97                     | 23.15                     | 11.33                     | 7.40                      | 15.39                     | 11.44                     |
| 4       | Female | Day 2 | 9:00 AM | 32.03                     | 19.92                     | 19.35                     | 14.19                     | 9.71                      | 35.13                     | 31.80                     |
| 5       | Male   | Day 2 | 9:00 AM | 12.94                     | 18.37                     | 69.62                     | 113.27                    | 62.75                     | 23.81                     | 23.25                     |
| 6       | Male   | Day 2 | 9:00 AM | 13.00                     | 29.50                     | 19.62                     | 25.64                     | 29.51                     | 32.19                     | 29.82                     |
| 7       | Female | Day 2 | 9:00 AM | 34.72                     | 46.28                     | 34.58                     | 8.90                      | 9.74                      | 34.45                     | 31.92                     |
| 8       | Male   | Day 2 | 9:00 AM | 35.67                     | 22.84                     | 23.74                     | 13.74                     | 15.37                     | 30.35                     | 21.96                     |
| 1       | Female | Day 2 | 3:00 PM | 34.24                     | 33.47                     | 19.14                     | 18.45                     | 17.08                     | 34.73                     | 39.35                     |
| 2       | Female | Day 2 | 3:00 PM | 75.72                     | 53.96                     | 21.94                     | 34.31                     | 10.82                     | 58.38                     | 39.34                     |
| 3       | Female | Day 2 | 3:00 PM | 20.75                     | 35.89                     | 28.72                     | 12.54                     | 19.33                     | 23.63                     | 18.95                     |
| 4       | Female | Day 2 | 3:00 PM | 29.50                     | 27.18                     | 25.67                     | 19.88                     | 15.80                     | 47.98                     | 22.78                     |
| 5       | Male   | Day 2 | 3:00 PM | 4.03                      | 9.98                      | 36.78                     | 10.37                     | 63.95                     | 23.34                     | 25.41                     |
| 6       | Male   | Day 2 | 3:00 PM | 14.21                     | 16.22                     | 18.81                     | 11.57                     | 12.09                     | 49.38                     | 30.63                     |
| 7       | Female | Day 2 | 3:00 PM | 19.17                     | 47.59                     | 55.21                     | 27.46                     | 13.32                     | 24.79                     | 56.46                     |
| 8       | Male   | Day 2 | 3:00 PM | 26.95                     | 26.02                     | 21.50                     | 21.66                     | 10.45                     | 27.71                     | 16.86                     |
| 1       | Female | Day 2 | 9:00 PM | 15.74                     | 37.70                     | 40.75                     | 21.35                     | 22.54                     | 23.42                     | 33.07                     |
| 2       | Female | Day 2 | 9:00 PM | 40.60                     | 24.95                     | 32.45                     | 23.20                     | 10.05                     | 32.81                     | 24.73                     |
| 3       | Female | Day 2 | 9:00 PM | 26.85                     | 37.02                     | 37.79                     | 8.63                      | 13.17                     | 17.38                     | 21.43                     |
| 4       | Female | Day 2 | 9:00 PM | 19.13                     | 25.37                     | 20.03                     | 13.17                     | 9.58                      | 27.89                     | 22.06                     |
| 5       | Male   | Day 2 | 9:00 PM | 20.81                     | 19.60                     | 27.49                     | 7.51                      | 56.54                     | 30.54                     | 15.20                     |
| 6       | Male   | Day 2 | 9:00 PM | 16.94                     | 12.96                     | 17.04                     | 13.14                     | 17.65                     | 22.69                     | 33.87                     |
| 7       | Female | Day 2 | 9:00 PM | 23.84                     | 58.66                     | 37.03                     | 21.40                     | 9.78                      | 37.20                     | 57.43                     |
| 8       | Male   | Day 2 | 9:00 PM | 25.63                     | 14.79                     | 15.68                     | 14.86                     | 15.37                     | 24.00                     | 13.88                     |
| 1       | Female | Day 3 | 9:00 AM | 47.98                     | 32.72                     | 23.15                     | 38.85                     | 14.23                     | 48.07                     | 33.52                     |
| 2       | Female | Day 3 | 9:00 AM | 48.77                     | 57.33                     | 29.94                     | 14.75                     | 13.53                     | 39.56                     | 51.12                     |
| 3       | Female | Day 3 | 9:00 AM | 38.88                     | 17.25                     | 19.25                     | 15.82                     | 16.38                     | 26.54                     | 23.56                     |
| 4       | Female | Day 3 | 9:00 AM | 26.07                     | 24.95                     | 34.84                     | 16.37                     | 7.27                      | 42.77                     | 41.32                     |
| 5       | Male   | Day 3 | 9:00 AM | 23.83                     | 57.06                     | 90.37                     | 93.77                     | 31.84                     | 39.89                     | 78.24                     |
| 6       | Male   | Day 3 | 9:00 AM | 21.09                     | 22.21                     | 30.42                     | 11.95                     | 17.21                     | 31.14                     | 14.09                     |
| 7       | Female | Day 3 | 9:00 AM | 40.59                     | 157.68                    | 57.96                     | 27.71                     | 15.90                     | 27.46                     | 31.87                     |
| 8       | Male   | Day 3 | 9:00 AM | 38.13                     | 25.61                     | 16.33                     | 16.52                     | 19.85                     | 14.07                     | 14.95                     |
| 1       | Female | Day 3 | 3:00 PM | 37.80                     | 18.31                     | 36.16                     | 35.64                     | 23.23                     | 46.33                     | 36.25                     |
| 2       | Female | Day 3 | 3:00 PM | 36.55                     | 46.80                     | 36.64                     | 23.48                     | 11.73                     | 61.12                     | 34.68                     |
| 3       | Female | Day 3 | 3:00 PM | 29.42                     | 16.45                     | 21.76                     | 11.25                     | 12.25                     | 11.91                     | 13.66                     |
| 4       | Female | Day 3 | 3:00 PM | 29.73                     | 22.85                     | 22.47                     | 14.81                     | 10.23                     | 34.38                     | 21.61                     |
| 5       | Male   | Day 3 | 3:00 PM | 11.42                     | 16.22                     | 30.14                     | 5.96                      | 25.03                     | 23.42                     | 27.71                     |
| 6       | Male   | Day 3 | 3:00 PM | 14.54                     | 25.81                     | 33.03                     | 19.70                     | 24.29                     | 22.59                     | 37.75                     |
| 7       | Female | Day 3 | 3:00 PM | 43.46                     | 32.72                     | 23.11                     | 21.69                     | 10.14                     | 31.56                     | 52.27                     |
| 8       | Male   | Day 3 | 3:00 PM | 26.20                     | 19.92                     | 16.61                     | 17.49                     | 22.79                     | 30.13                     | 17.54                     |
| 1       | Female | Day 3 | 9:00 PM | 31.49                     | 36.32                     | 39.16                     | 22.83                     | 14.73                     | 44.11                     | 23.88                     |
| 2       | Female | Day 3 | 9:00 PM | 40.36                     | 33.42                     | 27.78                     | 24.17                     | 13.68                     | 28.62                     | 33.09                     |
| 3       | Female | Day 3 | 9:00 PM | 26.71                     | 15.79                     | 30.33                     | 15.44                     | 19.99                     | 30.88                     | 26.96                     |
| 4       | Female | Day 3 | 9:00 PM | 26.39                     | 23.72                     | 33.13                     | 15.98                     | 16.07                     | 47.66                     | 37.67                     |
| 5       | Male   | Day 3 | 9:00 PM | 12.54                     | 17.03                     | 25.62                     | 7.00                      | 26.75                     | 25.52                     | 22.85                     |
| 6       | Male   | Day 3 | 9:00 PM | 25.45                     | 17.55                     | 47.43                     | 16.46                     | 22.36                     | 37.89                     | 27.46                     |
| 7       | Female | Day 3 | 9:00 PM | 40.55                     | 32.89                     | 33.54                     | 17.86                     | 33.13                     | 18.41                     | 31.95                     |
| 8       | Male   | Day 3 | 9:00 PM | 32.39                     | 16.34                     | 12.91                     | 9.69                      | 10.41                     | 18.84                     | 22.36                     |
