# Supplementary material for: Variability in Vowel Production within and between Days
Source: PubMed Central journal article supplement (PMC4558024; doi:10.1371/journal.pone.0136791), 2015-09-02
Supplement: pone.0136791.s007.pdf [file pone.0136791.s007.pdf]

| Subject | Sex    | Day   | Time    | Average SD in F2 for /IH/ | Average SD in F2 for /EH/ | Average SD in F2 for /UH/ | Average SD in F2 for /EE/ | Average SD in F2 for /OO/ | Average SD in F2 for /AE/ | Average SD in F2 for /AH/ |
|---------|--------|-------|---------|---------------------------|---------------------------|---------------------------|---------------------------|---------------------------|---------------------------|---------------------------|
| 1       | Female | Day 1 | 9:00 AM | 45.05                     | 59.91                     | 36.16                     | 69.85                     | 55.49                     | 140.41                    | 58.37                     |
| 2       | Female | Day 1 | 9:00 AM | 203.15                    | 157.30                    | 50.45                     | 309.21                    | 110.15                    | 185.84                    | 91.31                     |
| 3       | Female | Day 1 | 9:00 AM | 36.56                     | 34.66                     | 64.47                     | 38.69                     | 90.34                     | 42.50                     | 42.08                     |
| 4       | Female | Day 1 | 9:00 AM | 274.63                    | 226.42                    | 41.60                     | 324.80                    | 64.26                     | 92.25                     | 40.73                     |
| 5       | Male   | Day 1 | 9:00 AM | 32.83                     | 71.73                     | 29.03                     | 27.66                     | 298.89                    | 48.78                     | 32.59                     |
| 6       | Male   | Day 1 | 9:00 AM | 75.10                     | 26.88                     | 44.40                     | 52.01                     | 32.14                     | 65.18                     | 39.64                     |
| 7       | Female | Day 1 | 9:00 AM | 117.49                    | 116.69                    | 196.61                    | 80.57                     | 58.48                     | 70.37                     | 49.54                     |
| 8       | Male   | Day 1 | 9:00 AM | 35.74                     | 51.44                     | 41.98                     | 56.35                     | 74.49                     | 80.45                     | 18.39                     |
| 1       | Female | Day 1 | 3:00 PM | 49.57                     | 167.55                    | 39.56                     | 199.91                    | 70.81                     | 204.01                    | 48.74                     |
| 2       | Female | Day 1 | 3:00 PM | 207.26                    | 158.06                    | 50.65                     | 367.86                    | 57.86                     | 115.68                    | 116.08                    |
| 3       | Female | Day 1 | 3:00 PM | 50.15                     | 38.31                     | 25.14                     | 60.50                     | 91.33                     | 58.96                     | 41.47                     |
| 4       | Female | Day 1 | 3:00 PM | 213.90                    | 266.03                    | 44.06                     | 370.31                    | 64.58                     | 89.38                     | 33.37                     |
| 5       | Male   | Day 1 | 3:00 PM | 20.33                     | 46.44                     | 67.22                     | 29.91                     | 287.89                    | 36.89                     | 69.48                     |
| 6       | Male   | Day 1 | 3:00 PM | 42.38                     | 52.89                     | 22.02                     | 39.87                     | 35.60                     | 159.03                    | 25.33                     |
| 7       | Female | Day 1 | 3:00 PM | 67.01                     | 40.11                     | 40.36                     | 101.87                    | 50.79                     | 59.22                     | 29.72                     |
| 8       | Male   | Day 1 | 3:00 PM | 139.03                    | 64.08                     | 50.56                     | 74.80                     | 51.32                     | 68.39                     | 57.54                     |
| 1       | Female | Day 1 | 9:00 PM | 59.08                     | 52.51                     | 36.91                     | 44.54                     | 64.00                     | 140.42                    | 125.51                    |
| 2       | Female | Day 1 | 9:00 PM | 150.83                    | 242.77                    | 62.70                     | 505.47                    | 153.19                    | 225.37                    | 71.96                     |
| 3       | Female | Day 1 | 9:00 PM | 53.10                     | 47.00                     | 47.55                     | 114.15                    | 62.69                     | 42.51                     | 123.61                    |
| 4       | Female | Day 1 | 9:00 PM | 253.84                    | 148.48                    | 34.04                     | 262.30                    | 40.07                     | 175.39                    | 35.24                     |
| 5       | Male   | Day 1 | 9:00 PM | 64.48                     | 78.42                     | 213.92                    | 25.35                     | 267.03                    | 44.63                     | 43.27                     |
| 6       | Male   | Day 1 | 9:00 PM | 69.12                     | 34.45                     | 23.29                     | 26.57                     | 33.80                     | 98.85                     | 229.81                    |
| 7       | Female | Day 1 | 9:00 PM | 69.64                     | 41.88                     | 48.74                     | 85.33                     | 91.48                     | 46.71                     | 67.03                     |
| 8       | Male   | Day 1 | 9:00 PM | 17.55                     | 48.61                     | 28.53                     | 69.19                     | 48.09                     | 55.05                     | 20.08                     |
| 1       | Female | Day 2 | 9:00 AM | 71.19                     | 150.43                    | 35.96                     | 109.77                    | 62.99                     | 263.50                    | 142.16                    |
| 2       | Female | Day 2 | 9:00 AM | 183.00                    | 174.55                    | 16.48                     | 366.34                    | 50.29                     | 148.45                    | 28.78                     |
| 3       | Female | Day 2 | 9:00 AM | 46.96                     | 25.35                     | 37.74                     | 46.65                     | 24.74                     | 127.85                    | 41.23                     |
| 4       | Female | Day 2 | 9:00 AM | 190.93                    | 159.49                    | 22.99                     | 81.86                     | 48.16                     | 215.25                    | 41.05                     |
| 5       | Male   | Day 2 | 9:00 AM | 42.45                     | 62.41                     | 154.04                    | 158.76                    | 318.83                    | 44.12                     | 49.79                     |
| 6       | Male   | Day 2 | 9:00 AM | 51.88                     | 60.03                     | 21.84                     | 18.69                     | 109.92                    | 23.07                     | 50.24                     |
| 7       | Female | Day 2 | 9:00 AM | 220.44                    | 185.73                    | 33.55                     | 378.67                    | 41.09                     | 239.07                    | 44.10                     |
| 8       | Male   | Day 2 | 9:00 AM | 54.00                     | 48.77                     | 46.89                     | 39.62                     | 60.45                     | 79.19                     | 40.16                     |
| 1       | Female | Day 2 | 3:00 PM | 65.47                     | 137.31                    | 34.26                     | 47.64                     | 95.44                     | 181.13                    | 78.80                     |
| 2       | Female | Day 2 | 3:00 PM | 263.12                    | 246.70                    | 54.84                     | 320.06                    | 177.91                    | 113.34                    | 72.00                     |
| 3       | Female | Day 2 | 3:00 PM | 51.71                     | 46.68                     | 33.68                     | 35.75                     | 111.72                    | 56.80                     | 34.85                     |
| 4       | Female | Day 2 | 3:00 PM | 147.05                    | 66.82                     | 31.70                     | 198.66                    | 62.78                     | 187.12                    | 47.63                     |
| 5       | Male   | Day 2 | 3:00 PM | 27.87                     | 40.80                     | 53.18                     | 34.75                     | 340.68                    | 35.97                     | 51.31                     |
| 6       | Male   | Day 2 | 3:00 PM | 32.95                     | 25.89                     | 28.38                     | 23.71                     | 46.50                     | 55.48                     | 38.31                     |
| 7       | Female | Day 2 | 3:00 PM | 46.59                     | 85.81                     | 44.58                     | 159.27                    | 71.70                     | 54.09                     | 165.48                    |
| 8       | Male   | Day 2 | 3:00 PM | 34.73                     | 52.17                     | 40.77                     | 46.89                     | 21.12                     | 30.71                     | 24.34                     |
| 1       | Female | Day 2 | 9:00 PM | 39.25                     | 90.33                     | 25.17                     | 145.05                    | 118.97                    | 95.78                     | 22.08                     |
| 2       | Female | Day 2 | 9:00 PM | 159.49                    | 141.12                    | 34.56                     | 414.59                    | 83.71                     | 150.85                    | 45.63                     |
| 3       | Female | Day 2 | 9:00 PM | 92.43                     | 36.88                     | 19.98                     | 81.03                     | 30.64                     | 35.29                     | 19.84                     |
| 4       | Female | Day 2 | 9:00 PM | 125.29                    | 255.79                    | 30.59                     | 222.60                    | 60.88                     | 213.06                    | 34.85                     |
| 5       | Male   | Day 2 | 9:00 PM | 53.60                     | 83.99                     | 36.26                     | 42.55                     | 251.28                    | 39.46                     | 30.28                     |
| 6       | Male   | Day 2 | 9:00 PM | 54.81                     | 41.92                     | 21.03                     | 21.14                     | 42.06                     | 41.84                     | 50.68                     |
| 7       | Female | Day 2 | 9:00 PM | 88.46                     | 121.26                    | 47.14                     | 238.88                    | 107.56                    | 110.42                    | 44.11                     |
| 8       | Male   | Day 2 | 9:00 PM | 23.93                     | 46.55                     | 25.27                     | 36.85                     | 50.83                     | 29.73                     | 22.89                     |
| 1       | Female | Day 3 | 9:00 AM | 65.75                     | 109.64                    | 44.61                     | 75.13                     | 43.42                     | 246.26                    | 57.84                     |
| 2       | Female | Day 3 | 9:00 AM | 198.85                    | 201.58                    | 41.61                     | 362.30                    | 97.82                     | 75.86                     | 46.36                     |
| 3       | Female | Day 3 | 9:00 AM | 95.74                     | 44.20                     | 20.31                     | 57.98                     | 62.33                     | 48.67                     | 41.87                     |
| 4       | Female | Day 3 | 9:00 AM | 220.18                    | 180.66                    | 43.10                     | 343.52                    | 56.11                     | 162.24                    | 36.37                     |
| 5       | Male   | Day 3 | 9:00 AM | 60.13                     | 81.54                     | 49.50                     | 186.99                    | 248.19                    | 65.64                     | 254.62                    |
| 6       | Male   | Day 3 | 9:00 AM | 48.88                     | 53.25                     | 31.95                     | 61.43                     | 86.85                     | 37.51                     | 39.59                     |
| 7       | Female | Day 3 | 9:00 AM | 60.18                     | 240.98                    | 36.49                     | 137.70                    | 48.41                     | 106.99                    | 47.86                     |
| 8       | Male   | Day 3 | 9:00 AM | 97.29                     | 119.29                    | 24.51                     | 92.84                     | 48.21                     | 90.07                     | 54.72                     |
| 1       | Female | Day 3 | 3:00 PM | 94.30                     | 52.90                     | 36.33                     | 78.01                     | 108.01                    | 86.88                     | 44.47                     |
| 2       | Female | Day 3 | 3:00 PM | 177.08                    | 122.64                    | 50.55                     | 417.18                    | 92.25                     | 92.17                     | 43.22                     |
| 3       | Female | Day 3 | 3:00 PM | 58.05                     | 40.26                     | 40.86                     | 79.44                     | 88.73                     | 55.46                     | 39.19                     |
| 4       | Female | Day 3 | 3:00 PM | 163.49                    | 99.32                     | 14.12                     | 386.31                    | 65.83                     | 166.33                    | 27.31                     |
| 5       | Male   | Day 3 | 3:00 PM | 83.04                     | 57.97                     | 105.16                    | 25.36                     | 255.62                    | 43.09                     | 64.20                     |
| 6       | Male   | Day 3 | 3:00 PM | 47.40                     | 41.50                     | 17.73                     | 81.47                     | 139.57                    | 46.63                     | 50.97                     |
| 7       | Female | Day 3 | 3:00 PM | 78.75                     | 209.52                    | 62.01                     | 128.50                    | 102.77                    | 107.99                    | 71.79                     |
| 8       | Male   | Day 3 | 3:00 PM | 34.78                     | 31.05                     | 22.28                     | 35.40                     | 47.91                     | 39.60                     | 37.33                     |
| 1       | Female | Day 3 | 9:00 PM | 57.67                     | 87.81                     | 38.72                     | 48.95                     | 111.57                    | 197.39                    | 65.92                     |
| 2       | Female | Day 3 | 9:00 PM | 125.82                    | 138.54                    | 60.40                     | 412.49                    | 73.19                     | 91.69                     | 50.17                     |
| 3       | Female | Day 3 | 9:00 PM | 76.39                     | 52.08                     | 24.12                     | 263.98                    | 77.53                     | 96.30                     | 52.38                     |
| 4       | Female | Day 3 | 9:00 PM | 166.06                    | 264.53                    | 25.46                     | 128.73                    | 66.09                     | 218.26                    | 57.38                     |
| 5       | Male   | Day 3 | 9:00 PM | 44.61                     | 73.88                     | 21.02                     | 33.28                     | 255.44                    | 36.32                     | 37.59                     |
| 6       | Male   | Day 3 | 9:00 PM | 41.97                     | 42.72                     | 24.47                     | 47.25                     | 97.15                     | 34.48                     | 67.24                     |
| 7       | Female | Day 3 | 9:00 PM | 53.56                     | 144.97                    | 38.54                     | 121.47                    | 59.58                     | 135.40                    | 38.02                     |
| 8       | Male   | Day 3 | 9:00 PM | 52.02                     | 37.51                     | 21.24                     | 35.53                     | 57.93                     | 32.18                     | 29.50                     |
