# Supplementary material for: Variability in Vowel Production within and between Days
Source: PubMed Central journal article supplement (PMC4558024; doi:10.1371/journal.pone.0136791), 2015-09-02
Supplement: pone.0136791.s008.pdf [file pone.0136791.s008.pdf]

| Subject | Sex    | Day   | Time    | Average SD in F3 for /IH/ | Average SD in F3 for /EH/ | Average SD in F3 for /UH/ | Average SD in F3 for /EE/ | Average SD in F3 for /OO/ | Average SD in F3 for /AE/ | Average SD in F3 for /AH/ |
|---------|--------|-------|---------|---------------------------|---------------------------|---------------------------|---------------------------|---------------------------|---------------------------|---------------------------|
| 1       | Female | Day 1 | 9:00 AM | 38.36                     | 108.34                    | 90.04                     | 30.12                     | 131.85                    | 233.57                    | 234.07                    |
| 2       | Female | Day 1 | 9:00 AM | 273.37                    | 259.82                    | 66.73                     | 145.10                    | 90.07                     | 154.31                    | 146.94                    |
| 3       | Female | Day 1 | 9:00 AM | 243.35                    | 131.17                    | 172.15                    | 174.24                    | 191.39                    | 165.03                    | 186.51                    |
| 4       | Female | Day 1 | 9:00 AM | 305.52                    | 290.87                    | 66.98                     | 111.84                    | 64.33                     | 252.57                    | 60.49                     |
| 5       | Male   | Day 1 | 9:00 AM | 29.27                     | 93.81                     | 48.13                     | 58.32                     | 70.86                     | 32.20                     | 40.67                     |
| 6       | Male   | Day 1 | 9:00 AM | 49.18                     | 117.36                    | 101.77                    | 85.35                     | 66.73                     | 233.88                    | 190.98                    |
| 7       | Female | Day 1 | 9:00 AM | 214.92                    | 165.81                    | 149.32                    | 181.49                    | 160.29                    | 239.89                    | 115.51                    |
| 8       | Male   | Day 1 | 9:00 AM | 83.66                     | 129.05                    | 128.25                    | 67.48                     | 74.65                     | 187.91                    | 194.90                    |
| 1       | Female | Day 1 | 3:00 PM | 110.37                    | 277.49                    | 182.86                    | 102.83                    | 63.42                     | 304.89                    | 267.73                    |
| 2       | Female | Day 1 | 3:00 PM | 164.03                    | 193.91                    | 177.80                    | 93.92                     | 116.34                    | 76.45                     | 289.74                    |
| 3       | Female | Day 1 | 3:00 PM | 42.22                     | 95.54                     | 96.28                     | 76.89                     | 79.07                     | 76.54                     | 129.73                    |
| 4       | Female | Day 1 | 3:00 PM | 158.24                    | 345.17                    | 109.21                    | 92.20                     | 71.05                     | 179.62                    | 79.09                     |
| 5       | Male   | Day 1 | 3:00 PM | 26.35                     | 67.15                     | 46.76                     | 114.43                    | 58.34                     | 71.66                     | 43.47                     |
| 6       | Male   | Day 1 | 3:00 PM | 56.96                     | 48.54                     | 49.73                     | 91.92                     | 40.00                     | 150.57                    | 205.58                    |
| 7       | Female | Day 1 | 3:00 PM | 97.38                     | 184.58                    | 92.56                     | 221.90                    | 168.27                    | 248.65                    | 69.30                     |
| 8       | Male   | Day 1 | 3:00 PM | 97.84                     | 113.30                    | 83.93                     | 69.32                     | 106.84                    | 118.18                    | 178.70                    |
| 1       | Female | Day 1 | 9:00 PM | 97.12                     | 125.24                    | 63.83                     | 59.72                     | 147.79                    | 131.58                    | 66.51                     |
| 2       | Female | Day 1 | 9:00 PM | 147.11                    | 227.03                    | 154.88                    | 155.72                    | 128.85                    | 264.04                    | 278.69                    |
| 3       | Female | Day 1 | 9:00 PM | 57.75                     | 89.29                     | 65.79                     | 85.32                     | 50.77                     | 86.44                     | 98.45                     |
| 4       | Female | Day 1 | 9:00 PM | 171.13                    | 233.59                    | 57.36                     | 88.72                     | 54.66                     | 220.96                    | 79.20                     |
| 5       | Male   | Day 1 | 9:00 PM | 63.71                     | 67.45                     | 19.85                     | 135.94                    | 99.18                     | 41.73                     | 45.13                     |
| 6       | Male   | Day 1 | 9:00 PM | 60.60                     | 49.42                     | 83.16                     | 133.62                    | 24.17                     | 175.38                    | 156.32                    |
| 7       | Female | Day 1 | 9:00 PM | 105.84                    | 222.56                    | 82.12                     | 179.28                    | 107.17                    | 199.50                    | 79.90                     |
| 8       | Male   | Day 1 | 9:00 PM | 90.74                     | 92.50                     | 47.32                     | 77.35                     | 128.92                    | 134.73                    | 94.54                     |
| 1       | Female | Day 2 | 9:00 AM | 67.16                     | 282.74                    | 106.45                    | 63.90                     | 95.90                     | 347.45                    | 202.51                    |
| 2       | Female | Day 2 | 9:00 AM | 147.26                    | 224.14                    | 53.58                     | 139.01                    | 140.71                    | 163.96                    | 64.28                     |
| 3       | Female | Day 2 | 9:00 AM | 30.75                     | 99.65                     | 93.55                     | 63.07                     | 60.78                     | 54.60                     | 60.91                     |
| 4       | Female | Day 2 | 9:00 AM | 112.92                    | 181.13                    | 81.54                     | 61.12                     | 38.23                     | 222.62                    | 73.73                     |
| 5       | Male   | Day 2 | 9:00 AM | 45.83                     | 28.45                     | 96.58                     | 156.64                    | 81.17                     | 28.94                     | 43.79                     |
| 6       | Male   | Day 2 | 9:00 AM | 37.09                     | 89.30                     | 43.88                     | 158.75                    | 40.13                     | 131.37                    | 103.87                    |
| 7       | Female | Day 2 | 9:00 AM | 82.20                     | 189.52                    | 81.73                     | 123.93                    | 151.43                    | 247.73                    | 90.14                     |
| 8       | Male   | Day 2 | 9:00 AM | 32.20                     | 159.89                    | 68.30                     | 39.50                     | 130.12                    | 208.93                    | 102.45                    |
| 1       | Female | Day 2 | 3:00 PM | 134.15                    | 239.41                    | 61.54                     | 85.63                     | 76.37                     | 215.45                    | 234.26                    |
| 2       | Female | Day 2 | 3:00 PM | 258.83                    | 217.97                    | 63.20                     | 108.32                    | 89.88                     | 151.31                    | 99.13                     |
| 3       | Female | Day 2 | 3:00 PM | 96.29                     | 85.65                     | 81.07                     | 100.31                    | 52.71                     | 90.06                     | 67.17                     |
| 4       | Female | Day 2 | 3:00 PM | 175.01                    | 237.41                    | 56.24                     | 86.67                     | 64.66                     | 363.77                    | 40.73                     |
| 5       | Male   | Day 2 | 3:00 PM | 44.03                     | 33.93                     | 26.58                     | 68.84                     | 162.54                    | 57.58                     | 26.78                     |
| 6       | Male   | Day 2 | 3:00 PM | 46.48                     | 53.35                     | 63.72                     | 53.29                     | 24.39                     | 90.28                     | 57.60                     |
| 7       | Female | Day 2 | 3:00 PM | 124.36                    | 259.51                    | 104.63                    | 175.25                    | 81.77                     | 153.25                    | 95.95                     |
| 8       | Male   | Day 2 | 3:00 PM | 29.48                     | 80.55                     | 29.60                     | 59.55                     | 74.13                     | 127.05                    | 86.09                     |
| 1       | Female | Day 2 | 9:00 PM | 93.38                     | 225.61                    | 77.09                     | 85.66                     | 80.76                     | 201.30                    | 148.59                    |
| 2       | Female | Day 2 | 9:00 PM | 143.17                    | 185.37                    | 115.52                    | 127.48                    | 109.58                    | 120.10                    | 65.06                     |
| 3       | Female | Day 2 | 9:00 PM | 60.51                     | 85.69                     | 41.00                     | 127.16                    | 99.87                     | 39.43                     | 66.94                     |
| 4       | Female | Day 2 | 9:00 PM | 96.34                     | 231.51                    | 45.57                     | 96.69                     | 83.81                     | 291.34                    | 71.00                     |
| 5       | Male   | Day 2 | 9:00 PM | 67.33                     | 20.20                     | 17.05                     | 64.51                     | 241.07                    | 91.28                     | 29.80                     |
| 6       | Male   | Day 2 | 9:00 PM | 31.79                     | 43.35                     | 39.06                     | 108.03                    | 32.83                     | 84.80                     | 133.94                    |
| 7       | Female | Day 2 | 9:00 PM | 188.14                    | 334.62                    | 53.47                     | 86.72                     | 121.47                    | 181.53                    | 140.31                    |
| 8       | Male   | Day 2 | 9:00 PM | 65.57                     | 89.51                     | 61.68                     | 84.55                     | 78.52                     | 157.76                    | 93.93                     |
| 1       | Female | Day 3 | 9:00 AM | 110.79                    | 359.40                    | 149.74                    | 122.12                    | 103.48                    | 396.66                    | 293.62                    |
| 2       | Female | Day 3 | 9:00 AM | 249.82                    | 365.47                    | 73.37                     | 75.90                     | 176.23                    | 145.32                    | 253.54                    |
| 3       | Female | Day 3 | 9:00 AM | 118.11                    | 70.82                     | 73.08                     | 88.89                     | 77.90                     | 84.39                     | 121.00                    |
| 4       | Female | Day 3 | 9:00 AM | 177.95                    | 283.82                    | 31.04                     | 76.47                     | 60.21                     | 202.10                    | 104.91                    |
| 5       | Male   | Day 3 | 9:00 AM | 65.67                     | 69.53                     | 46.10                     | 160.84                    | 67.51                     | 31.90                     | 122.16                    |
| 6       | Male   | Day 3 | 9:00 AM | 62.13                     | 69.57                     | 50.98                     | 110.74                    | 105.43                    | 72.31                     | 138.84                    |
| 7       | Female | Day 3 | 9:00 AM | 90.62                     | 99.55                     | 89.42                     | 144.18                    | 128.27                    | 244.29                    | 131.57                    |
| 8       | Male   | Day 3 | 9:00 AM | 143.26                    | 214.89                    | 141.89                    | 103.08                    | 121.16                    | 102.68                    | 166.60                    |
| 1       | Female | Day 3 | 3:00 PM | 100.72                    | 107.22                    | 128.21                    | 50.15                     | 120.20                    | 288.90                    | 116.13                    |
| 2       | Female | Day 3 | 3:00 PM | 159.93                    | 140.21                    | 204.21                    | 181.25                    | 134.70                    | 162.90                    | 190.80                    |
| 3       | Female | Day 3 | 3:00 PM | 122.28                    | 95.18                     | 74.16                     | 77.88                     | 91.44                     | 110.58                    | 65.18                     |
| 4       | Female | Day 3 | 3:00 PM | 237.06                    | 269.01                    | 121.44                    | 99.37                     | 30.14                     | 262.66                    | 67.33                     |
| 5       | Male   | Day 3 | 3:00 PM | 88.95                     | 51.35                     | 41.58                     | 69.55                     | 94.90                     | 21.30                     | 22.61                     |
| 6       | Male   | Day 3 | 3:00 PM | 36.16                     | 113.93                    | 68.32                     | 73.87                     | 58.20                     | 132.02                    | 98.29                     |
| 7       | Female | Day 3 | 3:00 PM | 92.13                     | 234.54                    | 73.35                     | 164.09                    | 118.78                    | 329.56                    | 226.07                    |
| 8       | Male   | Day 3 | 3:00 PM | 93.91                     | 139.26                    | 98.75                     | 44.08                     | 65.92                     | 161.39                    | 31.48                     |
| 1       | Female | Day 3 | 9:00 PM | 80.85                     | 217.32                    | 91.39                     | 102.54                    | 99.52                     | 222.52                    | 177.96                    |
| 2       | Female | Day 3 | 9:00 PM | 159.72                    | 258.96                    | 97.64                     | 68.52                     | 154.90                    | 156.07                    | 176.49                    |
| 3       | Female | Day 3 | 9:00 PM | 151.63                    | 148.65                    | 72.38                     | 109.04                    | 39.37                     | 121.56                    | 118.93                    |
| 4       | Female | Day 3 | 9:00 PM | 102.62                    | 192.29                    | 68.40                     | 77.86                     | 48.21                     | 211.06                    | 37.32                     |
| 5       | Male   | Day 3 | 9:00 PM | 64.81                     | 55.51                     | 22.07                     | 57.10                     | 44.26                     | 85.27                     | 40.74                     |
| 6       | Male   | Day 3 | 9:00 PM | 48.75                     | 45.39                     | 43.71                     | 117.50                    | 65.58                     | 54.32                     | 151.66                    |
| 7       | Female | Day 3 | 9:00 PM | 243.05                    | 341.85                    | 63.81                     | 75.66                     | 121.38                    | 255.46                    | 185.50                    |
| 8       | Male   | Day 3 | 9:00 PM | 80.97                     | 114.81                    | 56.69                     | 67.93                     | 124.45                    | 124.45                    | 130.37                    |
