# Supplementary material for: Variability in Vowel Production within and between Days
Source: PubMed Central journal article supplement (PMC4558024; doi:10.1371/journal.pone.0136791), 2015-09-02
Supplement: pone.0136791.s009.pdf [file pone.0136791.s009.pdf]

| Subject | Sex    | Day   | Time    | Average length for /IH/ | Average length for /EH/ | Average length for /UH/ | Average length for /EE/ | Average length for /OO/ | Average length for /AE/ | Average length for /AH/ |
|---------|--------|-------|---------|-------------------------|-------------------------|-------------------------|-------------------------|-------------------------|-------------------------|-------------------------|
| 1       | Female | Day 1 | 9:00 AM | 398                     | 413                     | 440                     | 459                     | 460                     | 488                     | 491                     |
| 2       | Female | Day 1 | 9:00 AM | 172                     | 194                     | 182                     | 214                     | 213                     | 218                     | 219                     |
| 3       | Female | Day 1 | 9:00 AM | 274                     | 276                     | 288                     | 273                     | 309                     | 300                     | 278                     |
| 4       | Female | Day 1 | 9:00 AM | 220                     | 219                     | 220                     | 234                     | 257                     | 229                     | 237                     |
| 5       | Male   | Day 1 | 9:00 AM | 161                     | 160                     | 173                     | 194                     | 186                     | 175                     | 163                     |
| 6       | Male   | Day 1 | 9:00 AM | 164                     | 213                     | 217                     | 222                     | 214                     | 212                     | 232                     |
| 7       | Female | Day 1 | 9:00 AM | 176                     | 175                     | 166                     | 228                     | 217                     | 195                     | 204                     |
| 8       | Male   | Day 1 | 9:00 AM | 250                     | 268                     | 290                     | 291                     | 299                     | 276                     | 300                     |
| 1       | Female | Day 1 | 3:00 PM | 429                     | 438                     | 452                     | 457                     | 461                     | 489                     | 485                     |
| 2       | Female | Day 1 | 3:00 PM | 192                     | 194                     | 214                     | 245                     | 230                     | 239                     | 229                     |
| 3       | Female | Day 1 | 3:00 PM | 187                     | 204                     | 250                     | 283                     | 303                     | 314                     | 296                     |
| 4       | Female | Day 1 | 3:00 PM | 232                     | 211                     | 236                     | 237                     | 247                     | 241                     | 227                     |
| 5       | Male   | Day 1 | 3:00 PM | 240                     | 238                     | 243                     | 268                     | 259                     | 249                     | 236                     |
| 6       | Male   | Day 1 | 3:00 PM | 213                     | 235                     | 252                     | 253                     | 241                     | 229                     | 256                     |
| 7       | Female | Day 1 | 3:00 PM | 257                     | 257                     | 247                     | 306                     | 287                     | 246                     | 280                     |
| 8       | Male   | Day 1 | 3:00 PM | 217                     | 223                     | 237                     | 234                     | 229                     | 250                     | 254                     |
| 1       | Female | Day 1 | 9:00 PM | 414                     | 438                     | 422                     | 447                     | 460                     | 470                     | 467                     |
| 2       | Female | Day 1 | 9:00 PM | 176                     | 183                     | 206                     | 223                     | 211                     | 218                     | 216                     |
| 3       | Female | Day 1 | 9:00 PM | 188                     | 207                     | 226                     | 285                     | 301                     | 277                     | 293                     |
| 4       | Female | Day 1 | 9:00 PM | 254                     | 249                     | 257                     | 252                     | 262                     | 264                     | 266                     |
| 5       | Male   | Day 1 | 9:00 PM | 305                     | 301                     | 301                     | 321                     | 319                     | 302                     | 286                     |
| 6       | Male   | Day 1 | 9:00 PM | 188                     | 211                     | 219                     | 217                     | 223                     | 194                     | 214                     |
| 7       | Female | Day 1 | 9:00 PM | 225                     | 234                     | 238                     | 278                     | 259                     | 272                     | 262                     |
| 8       | Male   | Day 1 | 9:00 PM | 265                     | 270                     | 290                     | 290                     | 265                     | 290                     | 304                     |
| 1       | Female | Day 2 | 9:00 AM | 430                     | 435                     | 447                     | 470                     | 460                     | 461                     | 475                     |
| 2       | Female | Day 2 | 9:00 AM | 172                     | 170                     | 181                     | 196                     | 206                     | 211                     | 206                     |
| 3       | Female | Day 2 | 9:00 AM | 174                     | 192                     | 245                     | 319                     | 314                     | 319                     | 315                     |
| 4       | Female | Day 2 | 9:00 AM | 234                     | 231                     | 228                     | 241                     | 259                     | 236                     | 240                     |
| 5       | Male   | Day 2 | 9:00 AM | 336                     | 358                     | 340                     | 363                     | 379                     | 354                     | 351                     |
| 6       | Male   | Day 2 | 9:00 AM | 198                     | 217                     | 239                     | 230                     | 245                     | 224                     | 243                     |
| 7       | Female | Day 2 | 9:00 AM | 263                     | 269                     | 266                     | 305                     | 292                     | 260                     | 247                     |
| 8       | Male   | Day 2 | 9:00 AM | 330                     | 331                     | 342                     | 353                     | 301                     | 360                     | 373                     |
| 1       | Female | Day 2 | 3:00 PM | 317                     | 338                     | 320                     | 354                     | 351                     | 376                     | 355                     |
| 2       | Female | Day 2 | 3:00 PM | 170                     | 179                     | 200                     | 203                     | 211                     | 210                     | 213                     |
| 3       | Female | Day 2 | 3:00 PM | 172                     | 180                     | 220                     | 296                     | 306                     | 286                     | 283                     |
| 4       | Female | Day 2 | 3:00 PM | 206                     | 196                     | 194                     | 216                     | 206                     | 211                     | 206                     |
| 5       | Male   | Day 2 | 3:00 PM | 351                     | 350                     | 355                     | 390                     | 389                     | 379                     | 343                     |
| 6       | Male   | Day 2 | 3:00 PM | 191                     | 212                     | 224                     | 214                     | 221                     | 214                     | 222                     |
| 7       | Female | Day 2 | 3:00 PM | 217                     | 220                     | 231                     | 282                     | 252                     | 244                     | 248                     |
| 8       | Male   | Day 2 | 3:00 PM | 434                     | 461                     | 458                     | 462                     | 467                     | 497                     | 482                     |
| 1       | Female | Day 2 | 9:00 PM | 307                     | 316                     | 325                     | 342                     | 355                     | 368                     | 364                     |
| 2       | Female | Day 2 | 9:00 PM | 182                     | 193                     | 213                     | 218                     | 226                     | 236                     | 229                     |
| 3       | Female | Day 2 | 9:00 PM | 189                     | 194                     | 248                     | 270                     | 296                     | 306                     | 302                     |
| 4       | Female | Day 2 | 9:00 PM | 205                     | 198                     | 209                     | 209                     | 211                     | 215                     | 221                     |
| 5       | Male   | Day 2 | 9:00 PM | 364                     | 375                     | 370                     | 405                     | 393                     | 398                     | 321                     |
| 6       | Male   | Day 2 | 9:00 PM | 184                     | 198                     | 214                     | 198                     | 210                     | 198                     | 208                     |
| 7       | Female | Day 2 | 9:00 PM | 237                     | 237                     | 241                     | 267                     | 274                     | 256                     | 274                     |
| 8       | Male   | Day 2 | 9:00 PM | 405                     | 400                     | 415                     | 425                     | 422                     | 415                     | 423                     |
| 1       | Female | Day 3 | 9:00 AM | 387                     | 404                     | 408                     | 440                     | 424                     | 434                     | 431                     |
| 2       | Female | Day 3 | 9:00 AM | 191                     | 193                     | 208                     | 228                     | 228                     | 228                     | 224                     |
| 3       | Female | Day 3 | 9:00 AM | 191                     | 197                     | 251                     | 298                     | 316                     | 317                     | 303                     |
| 4       | Female | Day 3 | 9:00 AM | 244                     | 235                     | 234                     | 238                     | 259                     | 239                     | 245                     |
| 5       | Male   | Day 3 | 9:00 AM | 371                     | 392                     | 419                     | 425                     | 421                     | 396                     | 355                     |
| 6       | Male   | Day 3 | 9:00 AM | 208                     | 227                     | 246                     | 221                     | 250                     | 234                     | 244                     |
| 7       | Female | Day 3 | 9:00 AM | 247                     | 181                     | 254                     | 349                     | 332                     | 293                     | 264                     |
| 8       | Male   | Day 3 | 9:00 AM | 538                     | 522                     | 560                     | 555                     | 539                     | 536                     | 537                     |
| 1       | Female | Day 3 | 3:00 PM | 406                     | 423                     | 407                     | 435                     | 439                     | 437                     | 436                     |
| 2       | Female | Day 3 | 3:00 PM | 196                     | 197                     | 218                     | 235                     | 236                     | 243                     | 237                     |
| 3       | Female | Day 3 | 3:00 PM | 163                     | 176                     | 216                     | 276                     | 274                     | 301                     | 290                     |
| 4       | Female | Day 3 | 3:00 PM | 194                     | 202                     | 198                     | 203                     | 206                     | 193                     | 215                     |
| 5       | Male   | Day 3 | 3:00 PM | 331                     | 323                     | 344                     | 362                     | 363                     | 354                     | 313                     |
| 6       | Male   | Day 3 | 3:00 PM | 186                     | 186                     | 190                     | 175                     | 206                     | 194                     | 205                     |
| 7       | Female | Day 3 | 3:00 PM | 239                     | 235                     | 285                     | 338                     | 340                     | 272                     | 296                     |
| 8       | Male   | Day 3 | 3:00 PM | 554                     | 554                     | 535                     | 576                     | 577                     | 568                     | 573                     |
| 1       | Female | Day 3 | 9:00 PM | 316                     | 323                     | 320                     | 351                     | 350                     | 354                     | 355                     |
| 2       | Female | Day 3 | 9:00 PM | 207                     | 222                     | 238                     | 244                     | 243                     | 252                     | 252                     |
| 3       | Female | Day 3 | 9:00 PM | 165                     | 171                     | 211                     | 260                     | 292                     | 261                     | 265                     |
| 4       | Female | Day 3 | 9:00 PM | 237                     | 225                     | 235                     | 238                     | 240                     | 243                     | 255                     |
| 5       | Male   | Day 3 | 9:00 PM | 379                     | 361                     | 397                     | 446                     | 441                     | 405                     | 371                     |
| 6       | Male   | Day 3 | 9:00 PM | 158                     | 170                     | 162                     | 171                     | 184                     | 161                     | 168                     |
| 7       | Female | Day 3 | 9:00 PM | 241                     | 247                     | 233                     | 332                     | 303                     | 280                     | 303                     |
| 8       | Male   | Day 3 | 9:00 PM | 569                     | 554                     | 596                     | 609                     | 584                     | 601                     | 596                     |
